# Supplementary material for: Dietary Paper Mulberry Silage Supplementation Improves the Growth Performance, Carcass Characteristics, and Meat Quality of Yangzhou Goose
Source: MDPI journal article supplement (doi:10.3390/ani14030359), 2024-01-23

# **Dietary Paper Mulberry Silage Supplementation Improves the Growth Performance, Carcass Characteristics, and Meat Quality of Yangzhou Goose**

**Ruhui Wang <sup>1,2</sup>, Xin Wang <sup>1</sup>, Yi Xiong <sup>1</sup>, Jingwen Cao <sup>1</sup>, Luiz Gustavo Nussio <sup>3</sup>, Kuikui Ni <sup>1</sup>, Yanli Lin <sup>1</sup>, Xuekai Wang <sup>1,\*</sup> and Fuyu Yang <sup>1,2,\*</sup>**

<sup>1</sup> College of Grassland Science and Technology, China Agricultural University, Beijing 100193, China; wangruhui9288@163.com (R.W.); wangxin1814@126.com (X.W.); caojingwen1207@163.com (J.C.)

<sup>2</sup> College of Animal Science, Guizhou University, Guiyang 550025, China

<sup>3</sup> Department of Animal Sciences, Luiz de Queiroz College of Agriculture, University of Sao Paulo, Piracicaba 13418-900, Brazil; nussio@usp.br

\* Correspondence: xkwang@cau.edu.cn (X.W.); yfuyu@126.com (F.Y.); Tel.: +86-010-62733-052 (F.Y.)

## Supplementary Materials

**Table S1** Nutrient level of paper mulberry silage (air-dry basis). %

| Item       | Content | Item | Content | Item | Content |
|------------|---------|------|---------|------|---------|
| Moisture   | 64.30   | ADF  | 25.70   | Ca   | 1.49    |
| Dry Matter | 35.70   | NDF  | 30.30   | P    | 0.28    |
| CP         | 20.10   | Ash  | 7.40    | Mg   | 0.47    |
| EE         | 4.90    | WSC  | 10.20   | K    | 1.60    |

**Table S2** Identified for 381 metabolomics in positive ionization mode.

| No. | Name                         | m/z      | rt(s) | Addut                               | CON        | PM         | Variation |
|-----|------------------------------|----------|-------|-------------------------------------|------------|------------|-----------|
| 1   | D-Lysopine                   | 201.1242 | 354.4 | [M+H-H <sub>2</sub> O] <sup>+</sup> | 2517824.34 | 7528566.11 | ↑         |
| 2   | S-(Hydroxymethyl)glutathione | 320.0911 | 169.7 | [M+H-H <sub>2</sub> O] <sup>+</sup> | 19288442.3 | 12387832.2 | ↓         |
| 3   | CDP-Ethanolamine             | 447.0667 | 89.5  | [M+H] <sup>+</sup>                  | 7522634.13 | 12535327.1 | ↑         |
| 4   | Etiocholanedione             | 289.2163 | 842.8 | [M+H] <sup>+</sup>                  | 59214247   | 10177037   | ↓         |
| 5   | Phenylacetaldehyde           | 121.0648 | 340   | [M+H] <sup>+</sup>                  | 9949676.92 | 5971588.47 | ↓         |
| 6   | Tyramine                     | 138.0916 | 337.2 | [M+H] <sup>+</sup>                  | 2887111.59 | 3329489.31 | ↑         |
| 7   | Norlinolenic acid            | 264.2064 | 463.4 | [M] <sup>+</sup>                    | 545483.128 | 547488.846 | ↑         |
| 8   | Gentamicin X2                | 482.2621 | 967.2 | [M] <sup>+</sup>                    | 46884716.1 | 12958882.9 | ↓         |
| 9   | Cucurbitacin B               | 558.3189 | 905.6 | [M] <sup>+</sup>                    | 7177503.21 | 6933842.96 | ↓         |
| 10  | Cucurbitacin A               | 574.3139 | 822.8 | [M] <sup>+</sup>                    | 7208166.96 | 9019055.6  | ↑         |
| 11  | L-Olivosyl-oleandolide       | 516.3047 | 813.5 | [M] <sup>+</sup>                    | 27299765.6 | 18222887.4 | ↓         |
| 12  | Methylmalonic acid           | 101.0711 | 934.7 | [M+H-H <sub>2</sub> O] <sup>+</sup> | 22404759.6 | 23589052.5 | ↑         |
| 13  | Triethylamine                | 102.128  | 32.5  | [M+H] <sup>+</sup>                  | 26092386.2 | 23830689.4 | ↓         |
| 14  | Valeric acid                 | 102.0911 | 533.4 | [M] <sup>+</sup>                    | 3326764.92 | 2965388.44 | ↓         |
| 15  | Isovaleric acid              | 102.0912 | 377.7 | [M] <sup>+</sup>                    | 5235997.17 | 4379589.7  | ↓         |
| 16  | gamma-Aminobutyric acid      | 104.1074 | 85.7  | [M+H] <sup>+</sup>                  | 777526992  | 715965414  | ↓         |
| 17  | m-Cresol                     | 109.0653 | 188.6 | [M+H] <sup>+</sup>                  | 8526141.64 | 8971680.77 | ↑         |
| 18  | Hydroquinone                 | 110.0202 | 977.8 | [M] <sup>+</sup>                    | 102547279  | 79127987.6 | ↓         |
| 19  | Pyrrole-2-carboxylic acid    | 111.021  | 877   | [M] <sup>+</sup>                    | 118248556  | 98328717.5 | ↓         |
| 20  | Uracil                       | 113.0349 | 125.2 | [M+H] <sup>+</sup>                  | 114921937  | 95799751   | ↓         |
| 21  | Cytosine                     | 112.0514 | 100.7 | [M+H] <sup>+</sup>                  | 86429498.2 | 72459345.6 | ↓         |
| 22  | Quinoline                    | 112.0506 | 148.4 | [M+H-H <sub>2</sub> O] <sup>+</sup> | 67014075.2 | 18674340.4 | ↓         |
| 23  | Creatinine                   | 113.9641 | 143.6 | [M+H] <sup>+</sup>                  | 157956418  | 278550692  | ↑         |
| 24  | 3-Methylindole               | 132.081  | 805.6 | [M+H] <sup>+</sup>                  | 8250887.59 | 7634526.33 | ↓         |
| 25  | L-Proline                    | 116.0707 | 97.7  | [M+H] <sup>+</sup>                  | 1324591276 | 933280424  | ↓         |
| 26  | Betaine                      | 118.0862 | 90.8  | [M+H] <sup>+</sup>                  | 737871141  | 426725761  | ↓         |
| 27  | Indole                       | 117.0578 | 399.7 | [M] <sup>+</sup>                    | 258791699  | 240176197  | ↓         |
| 28  | L-Threonine                  | 120.0659 | 88    | [M+H] <sup>+</sup>                  | 306295582  | 178600937  | ↓         |

|    |                              |          |       |                                     |            |            |   |
|----|------------------------------|----------|-------|-------------------------------------|------------|------------|---|
| 29 | Phenylacetic acid            | 136.0495 | 80.6  | [M] <sup>+</sup>                    | 9337718.64 | 6480346.53 | ↓ |
| 30 | 4-Hydroxystyrene             | 121.0287 | 829.2 | [M+H] <sup>+</sup>                  | 31984385.2 | 26986097.3 | ↓ |
| 31 | Tyrosol                      | 121.0651 | 189.3 | [M+H-H <sub>2</sub> O] <sup>+</sup> | 3707640.35 | 4804729.64 | ↑ |
| 32 | L-Cysteine                   | 122.0275 | 485   | [M+H] <sup>+</sup>                  | 1384287.62 | 5145632.75 | ↑ |
| 33 | Niacinamide                  | 123.0548 | 237.3 | [M+H] <sup>+</sup>                  | 88606341.9 | 126959471  | ↑ |
| 34 | Thymine                      | 127.0505 | 338.3 | [M+H] <sup>+</sup>                  | 14457171.7 | 11139300.1 | ↓ |
| 35 | Pipecolic acid               | 130.05   | 86.9  | [M+H] <sup>+</sup>                  | 2019170625 | 2326254515 | ↑ |
| 36 | Heptanoic acid               | 130.9673 | 254.6 | [M+H] <sup>+</sup>                  | 12088932.6 | 7431762.03 | ↓ |
| 37 | cis-4-Hydroxy-L-proline      | 130.9673 | 205.6 | [M] <sup>+</sup>                    | 4513894.49 | 2852493.87 | ↓ |
| 38 | trans-Cinnamate              | 131.0495 | 340.1 | [M+H-H <sub>2</sub> O] <sup>+</sup> | 111178243  | 105056905  | ↓ |
| 39 | Normicotine                  | 149.0602 | 308.9 | [M+H] <sup>+</sup>                  | 503131.141 | 980879.812 | ↑ |
| 40 | (R)-Pantolactone             | 131.5337 | 977.8 | [M+H] <sup>+</sup>                  | 16377421.7 | 9487051.81 | ↓ |
| 41 | Glutaric acid                | 131.9744 | 60.1  | [M] <sup>+</sup>                    | 103043324  | 102470249  | ↓ |
| 42 | L-Leucine                    | 132.102  | 217.8 | [M+H] <sup>+</sup>                  | 1616000501 | 1509337015 | ↓ |
| 43 | L-Isoleucine                 | 132.1019 | 177.6 | [M+H] <sup>+</sup>                  | 901167876  | 887855968  | ↓ |
| 44 | L-Asparagine                 | 133.1057 | 157.5 | [M+H] <sup>+</sup>                  | 87021378.6 | 98621182.9 | ↑ |
| 45 | Xanthine                     | 153.0402 | 164.1 | [M+H] <sup>+</sup>                  | 752665089  | 618899865  | ↓ |
| 46 | 2-Hydroxyphenethylamine      | 137.0792 | 188.9 | [M] <sup>+</sup>                    | 25821955.5 | 22425795.8 | ↓ |
| 47 | Uracil 5-carboxylate         | 156.1206 | 779.6 | [M] <sup>+</sup>                    | 9398324.23 | 4809130.42 | ↓ |
| 48 | Urocanic acid                | 139.0506 | 284   | [M+H] <sup>+</sup>                  | 73577700.9 | 63274912.6 | ↓ |
| 49 | Phosphonoacetate             | 140.0709 | 118.9 | [M] <sup>+</sup>                    | 8138674.23 | 9598163.25 | ↑ |
| 50 | Allantoin                    | 158.9617 | 62.8  | [M+H] <sup>+</sup>                  | 66455612.7 | 44404964.7 | ↓ |
| 51 | Tryptophanol                 | 144.0804 | 399.1 | [M+H-H <sub>2</sub> O] <sup>+</sup> | 704645152  | 579852304  | ↓ |
| 52 | L-Carnitine                  | 162.112  | 89.4  | [M+H] <sup>+</sup>                  | 5742485730 | 5227456899 | ↓ |
| 53 | Anabasine                    | 144.9819 | 793.6 | [M+H-H <sub>2</sub> O] <sup>+</sup> | 46089133.7 | 42797180.8 | ↓ |
| 54 | 3-Hydroxymethylglutaric acid | 144.9818 | 892.7 | [M+H-H <sub>2</sub> O] <sup>+</sup> | 728909250  | 495424101  | ↓ |
| 55 | L-Lysine                     | 146.0604 | 338.6 | [M] <sup>+</sup>                    | 1470607.97 | 1790587.85 | ↑ |
| 56 | L-Glutamic acid              | 148.0606 | 89.3  | [M+H] <sup>+</sup>                  | 659551695  | 676514734  | ↑ |
| 57 | L-Glutamine                  | 147.0765 | 86.9  | [M+H] <sup>+</sup>                  | 1195821995 | 1323116956 | ↑ |
| 58 | L-2-Hydroxyglutaric acid     | 148.9773 | 60.6  | [M+H] <sup>+</sup>                  | 36176913.3 | 27980891.9 | ↓ |
| 59 | 3-Methyladenine              | 149.0231 | 459   | [M] <sup>+</sup>                    | 25580393.8 | 25286627.4 | ↓ |
| 60 | L-Methionine                 | 150.0589 | 125.1 | [M+H] <sup>+</sup>                  | 589282280  | 711821198  | ↑ |
| 61 | Pyridoxine                   | 152.071  | 99.3  | [M+H-H <sub>2</sub> O] <sup>+</sup> | 10513257.6 | 8201462.5  | ↓ |
| 62 | 1-Methylhistidine            | 170.0923 | 225.1 | [M+H] <sup>+</sup>                  | 8777634.15 | 3330493.29 | ↓ |
| 63 | 3-Hydroxyphenylacetic acid   | 153.0112 | 987.6 | [M+H] <sup>+</sup>                  | 28373427.2 | 32394262.8 | ↑ |
| 64 | Mandelic acid                | 152.9947 | 60.6  | [M+H] <sup>+</sup>                  | 16500259.6 | 10919871.6 | ↓ |
| 65 | 3-Amino-4-hydroxybenzoate    | 153.9933 | 59.2  | [M+H] <sup>+</sup>                  | 2649911.26 | 2390077.24 | ↓ |
| 66 | 2,3-Butanediol               | 154.0444 | 319.5 | [M] <sup>+</sup>                    | 8031221.35 | 4376043.89 | ↓ |
| 67 | Gentisic acid                | 154.9898 | 977.8 | [M+H] <sup>+</sup>                  | 788762678  | 701619011  | ↓ |
| 68 | 3-Dehydroshikimate           | 171.9931 | 332.3 | [M] <sup>+</sup>                    | 19390296   | 12297978.2 | ↓ |
| 69 | 4-Quinolinecarboxylic acid   | 155.9928 | 987.6 | [M+H-H <sub>2</sub> O] <sup>+</sup> | 62882794.2 | 87410179.6 | ↑ |
| 70 | L-Histidine                  | 156.0769 | 76.1  | [M+H] <sup>+</sup>                  | 112496871  | 100482037  | ↓ |
| 71 | 4,5-Dihydroorotic acid       | 158.9611 | 292.4 | [M+H] <sup>+</sup>                  | 49763668.6 | 35338356.9 | ↓ |
| 72 | N-Methyl-L-glutamic acid     | 162.0764 | 99.2  | [M+H] <sup>+</sup>                  | 45155512.3 | 47393670.9 | ↑ |

|     |                           |          |       |                                     |            |            |   |
|-----|---------------------------|----------|-------|-------------------------------------|------------|------------|---|
| 73  | Acetylcysteine            | 162.9981 | 35.5  | [M] <sup>+</sup>                    | 10703602.7 | 9199312.69 | ↓ |
| 74  | Pterin                    | 163.0388 | 712.3 | [M] <sup>+</sup>                    | 9837749.27 | 10658467.4 | ↑ |
| 75  | L-Fucose                  | 165.1138 | 973.4 | [M+H] <sup>+</sup>                  | 20896286.3 | 18610838.2 | ↓ |
| 76  | 6-Methylmercaptapurine    | 166.9883 | 706.4 | [M+H] <sup>+</sup>                  | 1253239.9  | 1503516.58 | ↑ |
| 77  | L-Phenylalanine           | 166.0864 | 340.1 | [M+H] <sup>+</sup>                  | 3244558418 | 1846967845 | ↓ |
| 78  | D-Ornithine hydrochloride | 169.0613 | 329   | [M+H] <sup>+</sup>                  | 2552635.33 | 3400519.61 | ↑ |
| 79  | Norepinephrine            | 169.9777 | 332.3 | [M+H] <sup>+</sup>                  | 67264841.7 | 111530271  | ↑ |
| 80  | N-Alpha-acetyllysine      | 188.071  | 399.1 | [M] <sup>+</sup>                    | 6242123247 | 1789012353 | ↓ |
| 81  | 2-Aminobenzenesulfonate   | 174.0224 | 451.8 | [M+H] <sup>+</sup>                  | 8387118.39 | 6845998.81 | ↓ |
| 82  | L-Arginine                | 175.1193 | 84.5  | [M+H] <sup>+</sup>                  | 612973199  | 656827968  | ↑ |
| 83  | Ascorbate                 | 176.9722 | 46.5  | [M+H] <sup>+</sup>                  | 4053929.07 | 5985494.76 | ↑ |
| 84  | Methyl beta-D-galactoside | 176.9721 | 60.1  | [M+H-H <sub>2</sub> O] <sup>+</sup> | 5384421.3  | 6760865.7  | ↑ |
| 85  | D-Gulono-1,4-lactone      | 178.1342 | 400.1 | [M] <sup>+</sup>                    | 5563657.67 | 5795220.04 | ↑ |
| 86  | myo-Inositol              | 181.0153 | 877   | [M+H] <sup>+</sup>                  | 122783240  | 92086060.5 | ↓ |
| 87  | Homovanillic acid         | 183.0842 | 162.6 | [M+H] <sup>+</sup>                  | 66145381.9 | 34206898.4 | ↓ |
| 88  | L-Tyrosine                | 182.0815 | 126.2 | [M+H] <sup>+</sup>                  | 654348800  | 576564231  | ↓ |
| 89  | Sorbitol                  | 182.9847 | 32.9  | [M+H] <sup>+</sup>                  | 23483151.1 | 15972600.2 | ↓ |
| 90  | Mannitol                  | 182.0817 | 395.9 | [M] <sup>+</sup>                    | 15135663.9 | 11906629.6 | ↓ |
| 91  | Epinephrine               | 184.0974 | 359.8 | [M+H] <sup>+</sup>                  | 78847847.3 | 88123191.9 | ↑ |
| 92  | Undecanoic acid           | 186.9566 | 62.4  | [M+H] <sup>+</sup>                  | 1324643.68 | 927010.885 | ↓ |
| 93  | N-Acetylglutamic acid     | 190.0717 | 835.3 | [M+H] <sup>+</sup>                  | 13251521.5 | 19834435.7 | ↑ |
| 94  | D-Glucuronic Acid         | 195.123  | 356.6 | [M+H] <sup>+</sup>                  | 1759399.24 | 1438118.18 | ↓ |
| 95  | Vanillylmandelic acid     | 198.1855 | 692.9 | [M] <sup>+</sup>                    | 6027157.49 | 9206749.75 | ↑ |
| 96  | Dodecanoic acid           | 199.9883 | 35.5  | [M] <sup>+</sup>                    | 4419171.28 | 4043199.43 | ↓ |
| 97  | Spermine                  | 203.2235 | 68.8  | [M+H] <sup>+</sup>                  | 43793751.4 | 40732423.4 | ↓ |
| 98  | L-Tryptophan              | 205.0977 | 399.1 | [M+H] <sup>+</sup>                  | 354044019  | 242871918  | ↓ |
| 99  | Butyrylcarnitine          | 231.2517 | 731.2 | [M] <sup>+</sup>                    | 2291630.89 | 2682806.62 | ↑ |
| 100 | 12-Hydroxydodecanoic acid | 216.1962 | 659   | [M] <sup>+</sup>                    | 459468.899 | 673293.341 | ↑ |
| 101 | Anserine                  | 240.0981 | 89.2  | [M] <sup>+</sup>                    | 3153376.32 | 11575796.8 | ↑ |
| 102 | Hydroxykynurenine         | 225.0871 | 115.5 | [M+H] <sup>+</sup>                  | 7375154.03 | 6870092.2  | ↓ |
| 103 | Porphobilinogen           | 226.1805 | 693   | [M] <sup>+</sup>                    | 10838929.5 | 11251369.8 | ↑ |
| 104 | Deoxyuridine              | 228.1961 | 747.5 | [M] <sup>+</sup>                    | 15860418.5 | 24820129.6 | ↑ |
| 105 | D-Ribose 5-phosphate      | 230.2479 | 752.9 | [M] <sup>+</sup>                    | 8981579.18 | 13848785.1 | ↑ |
| 106 | Lumichrome                | 243.0881 | 569.5 | [M+H] <sup>+</sup>                  | 32369727.9 | 10496533.8 | ↓ |
| 107 | 1-Hexadecanol             | 243.1828 | 378.7 | [M+H] <sup>+</sup>                  | 17462005   | 27581761.8 | ↑ |
| 108 | Adenosine                 | 250.094  | 336.5 | [M+H-H <sub>2</sub> O] <sup>+</sup> | 16340247.1 | 19773868.3 | ↑ |
| 109 | Palmitic acid             | 256.2639 | 953.1 | [M] <sup>+</sup>                    | 17016931.8 | 20685546.5 | ↑ |
| 110 | Alpha-Linolenic acid      | 279.232  | 857.9 | [M+H] <sup>+</sup>                  | 163722511  | 89409586.1 | ↓ |
| 111 | Linoleic acid             | 280.2641 | 939.1 | [M] <sup>+</sup>                    | 233838752  | 196247197  | ↓ |
| 112 | (6Z)-Octadecenoic acid    | 265.2526 | 821.5 | [M+H-H <sub>2</sub> O] <sup>+</sup> | 177759880  | 141881798  | ↓ |
| 113 | 5'-Methylthioadenosine    | 298.0977 | 387.3 | [M+H] <sup>+</sup>                  | 1381502098 | 1334130761 | ↓ |
| 114 | Oleic acid                | 282.279  | 822.8 | [M] <sup>+</sup>                    | 944757287  | 986669155  | ↑ |
| 115 | Guanosine                 | 284.099  | 282.5 | [M+H] <sup>+</sup>                  | 91041237.2 | 58793665   | ↓ |
| 116 | Glycitein                 | 285.0762 | 629.9 | [M+H] <sup>+</sup>                  | 179463.838 | 140375.023 | ↓ |

|     |                                   |          |       |                                     |            |            |   |
|-----|-----------------------------------|----------|-------|-------------------------------------|------------|------------|---|
| 117 | Fisetin                           | 286.2743 | 757.2 | [M] <sup>+</sup>                    | 7190030.07 | 6616831.9  | ↓ |
| 118 | 8,11,14-Eicosatrienoic acid       | 307.2638 | 895   | [M+H] <sup>+</sup>                  | 6932503.36 | 6484641.94 | ↓ |
| 119 | Glutathione                       | 307.0802 | 168.6 | [M] <sup>+</sup>                    | 2617816415 | 1976937810 | ↓ |
| 120 | Aflatoxin B1                      | 312.3627 | 847.3 | [M] <sup>+</sup>                    | 18379280.4 | 14932725.1 | ↓ |
| 121 | Pregnanediol                      | 321.3152 | 893.1 | [M+H] <sup>+</sup>                  | 126744607  | 170119391  | ↑ |
| 122 | CMP                               | 324.058  | 100.7 | [M+H] <sup>+</sup>                  | 82205818.2 | 45186448.5 | ↓ |
| 123 | Docosahexaenoic acid              | 328.1996 | 456.6 | [M] <sup>+</sup>                    | 1279447.42 | 962530.689 | ↓ |
| 124 | Nicotinamide ribotide             | 335.066  | 102.1 | [M+H] <sup>+</sup>                  | 50378129.9 | 55787273.9 | ↑ |
| 125 | Erucic acid                       | 338.3425 | 893.9 | [M] <sup>+</sup>                    | 4947915142 | 5195310352 | ↑ |
| 126 | Sucrose                           | 343.296  | 739.6 | [M+H] <sup>+</sup>                  | 4434654.98 | 4007425.33 | ↓ |
| 127 | IMP                               | 349.0549 | 123.4 | [M+H] <sup>+</sup>                  | 1738911200 | 1441860485 | ↓ |
| 128 | Thyrotropin releasing hormone     | 362.3249 | 732.7 | [M] <sup>+</sup>                    | 7249689.92 | 9043241.01 | ↑ |
| 129 | Riboflavin                        | 377.1456 | 449.8 | [M+H] <sup>+</sup>                  | 33807543.7 | 19787566.5 | ↓ |
| 130 | Vitamin D3                        | 367.336  | 941.3 | [M+H-H <sub>2</sub> O] <sup>+</sup> | 15220327.3 | 9545544.51 | ↓ |
| 131 | Cholesterol                       | 387.1929 | 799.6 | [M+H] <sup>+</sup>                  | 6729616.36 | 7420462.72 | ↑ |
| 132 | Deoxycholic acid                  | 393.2849 | 798.1 | [M+H] <sup>+</sup>                  | 700833202  | 701492391  | ↑ |
| 133 | Ergocalciferol                    | 397.1987 | 805.6 | [M+H] <sup>+</sup>                  | 44277665.2 | 22549778.6 | ↓ |
| 134 | S-Adenosylmethionine              | 399.1446 | 85.5  | [M+H] <sup>+</sup>                  | 82606848   | 87801524   | ↑ |
| 135 | Allocholic acid                   | 408.3687 | 903.7 | [M] <sup>+</sup>                    | 10724124.8 | 7576626.5  | ↓ |
| 136 | Lanosterin                        | 427.2748 | 640.6 | [M+H] <sup>+</sup>                  | 721403.176 | 847307.872 | ↑ |
| 137 | alpha-Tocopherol                  | 430.2429 | 532.5 | [M] <sup>+</sup>                    | 28734778.1 | 45275294   | ↑ |
| 138 | Sodium deoxycholate               | 415.2112 | 805.6 | [M+H] <sup>+</sup>                  | 193397011  | 1577591473 | ↑ |
| 139 | Isovitexin                        | 432.2345 | 804.3 | [M] <sup>+</sup>                    | 25930831.5 | 36589809.2 | ↑ |
| 140 | Deoxyuridine-5'-triphosphate      | 468.3902 | 973.1 | [M+H] <sup>+</sup>                  | 10475996.8 | 8966958.41 | ↓ |
| 141 | ATP                               | 507.2787 | 919   | [M] <sup>+</sup>                    | 9866866.8  | 9028914.51 | ↓ |
| 142 | beta-Carotene                     | 536.165  | 964.3 | [M] <sup>+</sup>                    | 57230265.1 | 44719930.2 | ↓ |
| 143 | Bilirubin                         | 584.4722 | 895   | [M] <sup>+</sup>                    | 23801487.8 | 19482362.8 | ↓ |
| 144 | Rutin                             | 610.1812 | 962.2 | [M] <sup>+</sup>                    | 40271475.2 | 18067203   | ↓ |
| 145 | Maltotetraose                     | 649.225  | 109.5 | [M+H-H <sub>2</sub> O] <sup>+</sup> | 63384028   | 49524823.1 | ↓ |
| 146 | Stachyose                         | 667.2271 | 102.2 | [M+H] <sup>+</sup>                  | 30739324.3 | 15587633.4 | ↓ |
| 147 | Choline                           | 104.1071 | 685.3 | [M+H] <sup>+</sup>                  | 1291122.58 | 1840852.45 | ↑ |
| 148 | Benzaldehyde                      | 107.0495 | 746.2 | [M+H] <sup>+</sup>                  | 89130279.9 | 70907821.4 | ↓ |
| 149 | o-Xylene                          | 107.0859 | 805.6 | [M+H] <sup>+</sup>                  | 7966680.96 | 6691618.15 | ↓ |
| 150 | Succinic acid                     | 119.0356 | 124.3 | [M+H] <sup>+</sup>                  | 818135407  | 681853692  | ↓ |
| 151 | 5-Aminoimidazole-4-carboxamide    | 126.056  | 61.1  | [M] <sup>+</sup>                    | 2574207.82 | 3035844.02 | ↑ |
| 152 | 1-Methylhistamine                 | 126.1029 | 84.8  | [M+H] <sup>+</sup>                  | 152400070  | 130957522  | ↓ |
| 153 | 1,2,3-Trihydroxybenzene           | 127.038  | 103.6 | [M+H] <sup>+</sup>                  | 473529464  | 372251111  | ↓ |
| 154 | Beta-Guanidinopropionic acid      | 132.0779 | 282.6 | [M+H] <sup>+</sup>                  | 52630391.1 | 61025415.2 | ↑ |
| 155 | Chavicol                          | 135.0807 | 630.1 | [M+H] <sup>+</sup>                  | 647768.133 | 880779.222 | ↑ |
| 156 | p-Anisaldehyde                    | 137.0593 | 188.4 | [M+H] <sup>+</sup>                  | 18012658.3 | 23797722.4 | ↑ |
| 157 | Kojic acid                        | 143.0341 | 105   | [M+H] <sup>+</sup>                  | 121821587  | 86241817.2 | ↓ |
| 158 | 3-(2-Hydroxyphenyl)propanoic acid | 149.06   | 830.3 | [M+H-H <sub>2</sub> O] <sup>+</sup> | 3366030.94 | 3620658.03 | ↑ |
| 159 | Guanine                           | 152.057  | 152.3 | [M+H] <sup>+</sup>                  | 399336409  | 302698158  | ↓ |
| 160 | Indoleacetaldehyde                | 160.0761 | 399   | [M+H] <sup>+</sup>                  | 40035285.3 | 48550131.6 | ↑ |

|     |                            |          |       |                                     |            |            |   |
|-----|----------------------------|----------|-------|-------------------------------------|------------|------------|---|
| 161 | Cysteinylglycine           | 179.0487 | 124.7 | [M+H] <sup>+</sup>                  | 13262428   | 14590685.7 | ↑ |
| 162 | Beta-Tyrosine              | 182.0677 | 304.5 | [M+H] <sup>+</sup>                  | 10010182.2 | 9491848.95 | ↓ |
| 163 | Propylthiouracil           | 153.0419 | 319.8 | [M+H-H <sub>2</sub> O] <sup>+</sup> | 45391486.1 | 62261495.7 | ↑ |
| 164 | N-Acetylhistidine          | 198.0871 | 76.1  | [M+H] <sup>+</sup>                  | 162337460  | 136211085  | ↓ |
| 165 | N6-Acetyl-L-lysine         | 189.1236 | 124.2 | [M+H] <sup>+</sup>                  | 51340937.3 | 51202591.5 | ↓ |
| 166 | Caryophyllene alpha-oxide  | 203.1798 | 827.3 | [M+H-H <sub>2</sub> O] <sup>+</sup> | 3907051.22 | 4459476.93 | ↑ |
| 167 | Myristoleic acid           | 209.1904 | 814.5 | [M+H-H <sub>2</sub> O] <sup>+</sup> | 3805269.01 | 5830701.45 | ↑ |
| 168 | Bergapten                  | 216.0425 | 952.8 | [M] <sup>+</sup>                    | 4694430.46 | 3765583.85 | ↓ |
| 169 | gamma-Glutamylalanine      | 219.0952 | 774.9 | [M+H] <sup>+</sup>                  | 4371375.02 | 1044602.26 | ↓ |
| 170 | Ergothioneine              | 230.0996 | 103.6 | [M] <sup>+</sup>                    | 51113329   | 55094205.9 | ↑ |
| 171 | Tolmetin                   | 258.1158 | 490.7 | [M+H] <sup>+</sup>                  | 913648.698 | 497104.506 | ↓ |
| 172 | Daidzein                   | 255.0654 | 618.1 | [M+H] <sup>+</sup>                  | 1618963.14 | 1175692.76 | ↓ |
| 173 | Stearidonic acid           | 277.2163 | 812   | [M+H] <sup>+</sup>                  | 21672028.5 | 21533782.2 | ↓ |
| 174 | Oleamide                   | 282.2794 | 917.2 | [M+H] <sup>+</sup>                  | 272870337  | 204310880  | ↓ |
| 175 | Octadecanamide             | 284.2946 | 927.4 | [M+H] <sup>+</sup>                  | 95690855.3 | 123924549  | ↑ |
| 176 | Inosine                    | 269.0881 | 232.7 | [M+H] <sup>+</sup>                  | 378068001  | 279122906  | ↓ |
| 177 | Aspartame                  | 295.1291 | 424   | [M+H] <sup>+</sup>                  | 13351889.6 | 9113425.07 | ↓ |
| 178 | Sulfamethazine             | 279.0934 | 754.1 | [M+H] <sup>+</sup>                  | 4813576.21 | 3007481.24 | ↓ |
| 179 | Exemestane                 | 279.1703 | 487.9 | [M+H-H <sub>2</sub> O] <sup>+</sup> | 8811234.91 | 8000869.47 | ↓ |
| 180 | Norethindrone              | 281.1904 | 714.3 | [M+H-H <sub>2</sub> O] <sup>+</sup> | 1406981.91 | 1430655.41 | ↑ |
| 181 | Etiocholanolone            | 291.2325 | 857.9 | [M+H] <sup>+</sup>                  | 15448074.2 | 19553861.6 | ↑ |
| 182 | N-Acetyl-a-neuraminic acid | 310.1134 | 99.1  | [M+H] <sup>+</sup>                  | 20850983.9 | 19467884.9 | ↓ |
| 183 | 9-OxoODE                   | 295.2261 | 699.2 | [M+H] <sup>+</sup>                  | 21155382.1 | 24653047.6 | ↑ |
| 184 | Oxycodone                  | 298.1459 | 551.7 | [M+H-H <sub>2</sub> O] <sup>+</sup> | 4532298.7  | 2811964.08 | ↓ |
| 185 | Metoclopramide             | 300.1447 | 609.5 | [M+H] <sup>+</sup>                  | 5315984.84 | 5496166.32 | ↑ |
| 186 | 9-cis-Retinoic acid        | 301.2165 | 784   | [M+H] <sup>+</sup>                  | 6934193.16 | 5924382.34 | ↓ |
| 187 | Palmitoylethanolamide      | 300.29   | 954.8 | [M+H] <sup>+</sup>                  | 328629844  | 114710615  | ↓ |
| 188 | Sphingosine                | 300.2901 | 776.9 | [M+H] <sup>+</sup>                  | 13558247.8 | 13482077   | ↓ |
| 189 | Fluvoxamine                | 319.167  | 449.5 | [M+H] <sup>+</sup>                  | 1421779.71 | 1781442.4  | ↑ |
| 190 | 8-HETE                     | 303.2319 | 876.1 | [M+H-H <sub>2</sub> O] <sup>+</sup> | 17800215.5 | 72442655.8 | ↑ |
| 191 | 12-KETE                    | 318.228  | 570.4 | [M] <sup>+</sup>                    | 1998359.23 | 2885420.72 | ↑ |
| 192 | Prostaglandin B1           | 319.2262 | 713.1 | [M+H-H <sub>2</sub> O] <sup>+</sup> | 190151.769 | 3216233.85 | ↑ |
| 193 | 20-HETE                    | 320.2307 | 732.2 | [M] <sup>+</sup>                    | 1454138.15 | 894234.476 | ↓ |
| 194 | UMP                        | 325.0489 | 112.9 | [M+H] <sup>+</sup>                  | 31620986   | 35904025.5 | ↑ |
| 195 | Ethyl icosapentate         | 331.2631 | 846.6 | [M+H] <sup>+</sup>                  | 11778908   | 44914920.9 | ↑ |
| 196 | Anandamide                 | 348.2891 | 912.7 | [M+H] <sup>+</sup>                  | 46232158.8 | 53157952.4 | ↑ |
| 197 | Prostaglandin H2           | 335.2218 | 714.1 | [M+H-H <sub>2</sub> O] <sup>+</sup> | 21757829.2 | 16890931.3 | ↓ |
| 198 | Prostaglandin B2           | 335.2199 | 813.3 | [M+H] <sup>+</sup>                  | 105118032  | 65418263.9 | ↓ |
| 199 | Prostaglandin D2           | 335.2218 | 788.7 | [M+H-H <sub>2</sub> O] <sup>+</sup> | 15756345.6 | 9564918.19 | ↓ |
| 200 | 13,14-Dihydro-15-keto-PGE2 | 335.2217 | 725.3 | [M+H-H <sub>2</sub> O] <sup>+</sup> | 9398139.39 | 10204112   | ↑ |
| 201 | Prostaglandin F3a          | 335.2218 | 686.8 | [M+H-H <sub>2</sub> O] <sup>+</sup> | 23864085.2 | 12321354.3 | ↓ |
| 202 | Prostaglandin E1           | 337.2375 | 729.5 | [M+H-H <sub>2</sub> O] <sup>+</sup> | 2974211.96 | 3044520.04 | ↑ |
| 203 | AMP                        | 348.0695 | 121.7 | [M+H] <sup>+</sup>                  | 401122111  | 800444016  | ↑ |
| 204 | 3'-AMP                     | 348.0695 | 100.7 | [M+H] <sup>+</sup>                  | 53740194.8 | 46688979.2 | ↓ |

|     |                                     |          |       |                                     |            |            |   |
|-----|-------------------------------------|----------|-------|-------------------------------------|------------|------------|---|
| 205 | Lathosterol                         | 369.3523 | 957.9 | [M+H-H <sub>2</sub> O] <sup>+</sup> | 34702978.2 | 32722148.5 | ↓ |
| 206 | Gamma-Tocotrienol                   | 410.3184 | 929   | [M] <sup>+</sup>                    | 17665120.6 | 13195327.7 | ↓ |
| 207 | beta-Sitosterol                     | 397.3826 | 965.4 | [M+H-H <sub>2</sub> O] <sup>+</sup> | 17085354.8 | 23152323.9 | ↑ |
| 208 | 1-palmitoylglycerophosphocholine    | 496.3405 | 791.7 | [M] <sup>+</sup>                    | 158341784  | 134243087  | ↓ |
| 209 | NAD                                 | 664.1226 | 124.4 | [M] <sup>+</sup>                    | 10210923.9 | 8193059.86 | ↓ |
| 210 | allopurinol                         | 137.0447 | 386.5 | [M+H] <sup>+</sup>                  | 93590982   | 107522376  | ↑ |
| 211 | Fludrocortisone                     | 380.2085 | 929.3 | [M] <sup>+</sup>                    | 18864164.6 | 22842103.4 | ↑ |
| 212 | Cafestol                            | 317.2118 | 788.9 | [M+H] <sup>+</sup>                  | 9249521.03 | 3752416    | ↓ |
| 213 | O-Acetylcarnitine                   | 205.1269 | 124.4 | [M+H] <sup>+</sup>                  | 341979373  | 303439470  | ↓ |
| 214 | N-Acetyl-L-phenylalanine            | 207.0954 | 702.3 | [M] <sup>+</sup>                    | 19630761.8 | 27445524.3 | ↑ |
| 215 | Dethiobiotin                        | 215.1397 | 249.3 | [M+H] <sup>+</sup>                  | 14151643.5 | 15263419.3 | ↑ |
| 216 | (-)-Epigallocatechin                | 306.0761 | 166.8 | [M] <sup>+</sup>                    | 15050866.9 | 14833663.6 | ↓ |
| 217 | Di-2-propenyl sulfide               | 115.0545 | 399.1 | [M+H] <sup>+</sup>                  | 67061814.3 | 69570699.2 | ↑ |
| 218 | 6-Hydroxyhexanoic acid              | 133.0845 | 399.1 | [M+H] <sup>+</sup>                  | 10741688.3 | 9181395.42 | ↓ |
| 219 | 2-Phenylacetamide                   | 136.0762 | 429   | [M+H] <sup>+</sup>                  | 2129181.04 | 4056476.21 | ↑ |
| 220 | Indolepyruvate                      | 204.0696 | 439.6 | [M+H] <sup>+</sup>                  | 1012680.82 | 701142.528 | ↓ |
| 221 | Propionylcarnitine                  | 218.1389 | 269.7 | [M+H] <sup>+</sup>                  | 1085916626 | 1212896999 | ↑ |
| 222 | Gamma-Linolenic acid                | 279.2313 | 841.4 | [M+H] <sup>+</sup>                  | 15497411.9 | 10870231.6 | ↓ |
| 223 | L-Octanoylcarnitine                 | 288.2173 | 621.1 | [M+H] <sup>+</sup>                  | 251439681  | 94566079.2 | ↓ |
| 224 | Liquiritin                          | 401.1304 | 282.8 | [M+H-H <sub>2</sub> O] <sup>+</sup> | 19389215.5 | 13916691.1 | ↓ |
| 225 | Myriocin                            | 384.2742 | 708.5 | [M+H-H <sub>2</sub> O] <sup>+</sup> | 5330114.03 | 4633194.38 | ↓ |
| 226 | Adenylsuccinic acid                 | 464.0804 | 312.7 | [M+H] <sup>+</sup>                  | 9766154.45 | 4853421.12 | ↓ |
| 227 | N-Methyl-2-pyrrolidinone            | 100.0762 | 340.3 | [M+H] <sup>+</sup>                  | 6751931.52 | 3749102.26 | ↓ |
| 228 | 4-Hydroxybenzaldehyde               | 123.0444 | 126.5 | [M+H] <sup>+</sup>                  | 80418716.9 | 61806255.3 | ↓ |
| 229 | 8-Hydroxyquinoline                  | 146.0595 | 399.1 | [M+H] <sup>+</sup>                  | 540858233  | 452701608  | ↓ |
| 230 | Isoquinoline                        | 130.0659 | 399.3 | [M+H] <sup>+</sup>                  | 104519964  | 73909409.3 | ↓ |
| 231 | 2-Naphthylamine                     | 144.0813 | 441.4 | [M+H] <sup>+</sup>                  | 23233278.4 | 16862728.6 | ↓ |
| 232 | 1,5-Naphthalenediamine              | 159.092  | 399.1 | [M+H] <sup>+</sup>                  | 99991302.3 | 116564214  | ↑ |
| 233 | 3,4-Dihydroxyphenylpropanoate       | 165.0547 | 126.2 | [M+H-H <sub>2</sub> O] <sup>+</sup> | 213889475  | 222661669  | ↑ |
| 234 | Jasmone                             | 165.1278 | 497.9 | [M+H] <sup>+</sup>                  | 1487620.99 | 1952954.79 | ↑ |
| 235 | Glycyl-leucine                      | 189.1244 | 366   | [M+H] <sup>+</sup>                  | 58544907.4 | 37932156   | ↓ |
| 236 | Nootkatone                          | 219.1746 | 868.3 | [M+H] <sup>+</sup>                  | 10602495.6 | 13991682.6 | ↑ |
| 237 | N-Acetyl-D-galactosamine            | 204.0869 | 99.3  | [M+H-H <sub>2</sub> O] <sup>+</sup> | 25922877   | 9809069.37 | ↓ |
| 238 | Diethylpropion                      | 206.1525 | 117.7 | [M+H] <sup>+</sup>                  | 22033660.7 | 27430270.4 | ↑ |
| 239 | 3,3'-Dimethoxybenzidine             | 244.1195 | 974.6 | [M] <sup>+</sup>                    | 13707511   | 22494644.3 | ↑ |
| 240 | (-)-Columbianetin                   | 247.0935 | 741.3 | [M+H] <sup>+</sup>                  | 2081500.49 | 2428677.39 | ↑ |
| 241 | Penbutolol                          | 292.2273 | 629.2 | [M+H] <sup>+</sup>                  | 1317107.65 | 1510618.81 | ↑ |
| 242 | N6-(L-1,3-Dicarboxypropyl)-L-lysine | 277.1396 | 86.8  | [M+H] <sup>+</sup>                  | 24351429.2 | 17563490.4 | ↓ |
| 243 | (9Z,11E,13E)-Octadecatrienoic acid  | 279.2316 | 706.3 | [M+H] <sup>+</sup>                  | 13061035.8 | 4620072.81 | ↓ |
| 244 | N7-Methylguanosine                  | 298.115  | 323.6 | [M] <sup>+</sup>                    | 2964272.76 | 2776330.4  | ↓ |
| 245 | Tridemorph                          | 298.311  | 944.7 | [M+H] <sup>+</sup>                  | 37073605.8 | 49624192.5 | ↑ |
| 246 | Diosmetin                           | 301.064  | 83    | [M+H] <sup>+</sup>                  | 73408915.3 | 49810407   | ↓ |
| 247 | Oleoylethanolamide                  | 326.3059 | 970.4 | [M+H] <sup>+</sup>                  | 89763839.5 | 98894302.9 | ↑ |
| 248 | Testosterone cypionate              | 412.3043 | 742.4 | [M] <sup>+</sup>                    | 8577244.8  | 14448133.7 | ↑ |

|     |                                                   |          |       |                                     |            |            |   |
|-----|---------------------------------------------------|----------|-------|-------------------------------------|------------|------------|---|
| 249 | Raffinose                                         | 487.1651 | 99.3  | [M+H-H <sub>2</sub> O] <sup>+</sup> | 39894212.6 | 45273862.4 | ↑ |
| 250 | 2-Hydroxybutyric acid                             | 104.0534 | 125.3 | [M] <sup>+</sup>                    | 10873425.1 | 11120313.7 | ↑ |
| 251 | 2-Phenylethanol                                   | 105.0703 | 805.6 | [M+H-H <sub>2</sub> O] <sup>+</sup> | 5413083.97 | 6463208.58 | ↑ |
| 252 | para-Phenylenediamine                             | 109.0766 | 84.8  | [M+H] <sup>+</sup>                  | 168980009  | 198447449  | ↑ |
| 253 | 5-Methyl-2-furancarboxaldehyde                    | 110.0353 | 149.3 | [M] <sup>+</sup>                    | 201738790  | 182825792  | ↓ |
| 254 | Imidazole-4-acetaldehyde                          | 111.0558 | 45.8  | [M+H] <sup>+</sup>                  | 43296964.9 | 26695431.6 | ↓ |
| 255 | Monomethyl sulfate                                | 111.9847 | 62.3  | [M] <sup>+</sup>                    | 5918541.39 | 6576459.93 | ↑ |
| 256 | 1-Pyrroline-5-carboxylic acid                     | 113.0462 | 61.9  | [M] <sup>+</sup>                    | 2594464.04 | 2379452.32 | ↓ |
| 257 | Agmatine                                          | 113.1158 | 67.5  | [M+H-H <sub>2</sub> O] <sup>+</sup> | 5801321.4  | 5494225.72 | ↓ |
| 258 | 1-Pyrroline-2-carboxylic acid                     | 114.0662 | 449.5 | [M+H] <sup>+</sup>                  | 70240037.8 | 90990345.7 | ↑ |
| 259 | Epsilon-caprolactam                               | 114.0918 | 423.6 | [M+H] <sup>+</sup>                  | 10203163.9 | 5025439.53 | ↓ |
| 260 | L-3-Cyanoalanine                                  | 115.0507 | 94.9  | [M+H] <sup>+</sup>                  | 24030858.2 | 16152354.4 | ↓ |
| 261 | 1-Deoxy-D-xylulose                                | 117.0571 | 188.7 | [M+H-H <sub>2</sub> O] <sup>+</sup> | 13178954.7 | 12600738   | ↓ |
| 262 | 5-Hydroxypentanoic acid                           | 118.0655 | 162.7 | [M] <sup>+</sup>                    | 18589164.6 | 49839574.5 | ↑ |
| 263 | 2-Methylserine                                    | 119.0501 | 125.9 | [M] <sup>+</sup>                    | 83523339.4 | 79355789.2 | ↓ |
| 264 | Styrene Oxide                                     | 120.0452 | 341.4 | [M] <sup>+</sup>                    | 4718971.21 | 2919478.46 | ↓ |
| 265 | 5-Hydroxypyrazinamide                             | 124.0478 | 188.1 | [M+H] <sup>+</sup>                  | 5649242.24 | 4332131.13 | ↓ |
| 266 | (R)-5,6-Dihydrothymine                            | 128.0716 | 62.3  | [M] <sup>+</sup>                    | 1030461.24 | 832520.721 | ↓ |
| 267 | 5-Amino-2-oxopentanoic acid                       | 131.0537 | 157.6 | [M] <sup>+</sup>                    | 12660297.7 | 9444487.77 | ↓ |
| 268 | D-allo-Isoleucine                                 | 132.1021 | 365.8 | [M+H] <sup>+</sup>                  | 11774183.3 | 17635429.5 | ↑ |
| 269 | 4-Hydroxyphenylacetaldehyde                       | 136.0618 | 675   | [M] <sup>+</sup>                    | 1986400.13 | 2694027.6  | ↑ |
| 270 | Propanoyl phosphate                               | 153.9936 | 979.1 | [M] <sup>+</sup>                    | 42437130.7 | 33609729.4 | ↓ |
| 271 | Trigonelline                                      | 137.045  | 963.3 | [M] <sup>+</sup>                    | 29423392   | 37568417.2 | ↑ |
| 272 | 4-Hydroxybenzoic acid                             | 138.0297 | 284   | [M] <sup>+</sup>                    | 158263778  | 74447135.5 | ↓ |
| 273 | 3-Hydroxybenzoic acid                             | 138.0299 | 192.7 | [M] <sup>+</sup>                    | 5424015.73 | 5104823.27 | ↓ |
| 274 | (3S,5S)-Carbapenam-3-carboxylic acid              | 155.0566 | 283.9 | [M] <sup>+</sup>                    | 10415961.2 | 17117484.1 | ↑ |
| 275 | Acetylphosphate                                   | 139.9817 | 294.2 | [M] <sup>+</sup>                    | 57346579.5 | 60905434.7 | ↑ |
| 276 | 5-(2-Hydroxyethyl)-4-methylthiazole               | 143.0399 | 987.6 | [M] <sup>+</sup>                    | 18193577   | 15523908.3 | ↓ |
| 277 | Ectoine                                           | 143.0818 | 100.6 | [M+H] <sup>+</sup>                  | 30203497.2 | 25432196.7 | ↓ |
| 278 | 2-Keto-glutaramic acid                            | 145.0499 | 89.6  | [M] <sup>+</sup>                    | 27312354.3 | 43791730.3 | ↑ |
| 279 | Acetylcholine                                     | 146.118  | 393.6 | [M] <sup>+</sup>                    | 9492211.5  | 8393435.53 | ↓ |
| 280 | Coumarin                                          | 147.0444 | 126.3 | [M+H] <sup>+</sup>                  | 77037509.3 | 66646381.6 | ↓ |
| 281 | 2-Dehydropanoate                                  | 147.0637 | 399   | [M+H] <sup>+</sup>                  | 74361306.2 | 47162426.9 | ↓ |
| 282 | (S)-2-Methylmalate                                | 148.0429 | 115.8 | [M] <sup>+</sup>                    | 82540180   | 79898065.3 | ↓ |
| 283 | 2-Oxo-4-methylthiobutanoic acid                   | 149.0234 | 722   | [M+H] <sup>+</sup>                  | 8579366.41 | 14590301.9 | ↑ |
| 284 | Acetaminophen                                     | 151.0618 | 330.6 | [M] <sup>+</sup>                    | 31238369.4 | 51118543.7 | ↑ |
| 285 | p-Hydroxyphenylacetic acid                        | 153.0406 | 228.5 | [M+H] <sup>+</sup>                  | 32966177   | 27757233.6 | ↓ |
| 286 | 2-Biphenylol                                      | 153.066  | 84.7  | [M+H-H <sub>2</sub> O] <sup>+</sup> | 149488831  | 162319038  | ↑ |
| 287 | 2-Pyrocatechuic acid                              | 154.0415 | 401.2 | [M] <sup>+</sup>                    | 1474129388 | 1555113254 | ↑ |
| 288 | Imidazol-5-yl-pyruvate                            | 155.0455 | 401.2 | [M+H] <sup>+</sup>                  | 207016086  | 207428367  | ↑ |
| 289 | (1R,6S)-6-Amino-5-oxocyclohex-2-ene-1-carboxylate | 155.0566 | 232.2 | [M] <sup>+</sup>                    | 3099161.12 | 3756028.95 | ↑ |
| 290 | 2,6-Dimethoxyphenol                               | 155.0706 | 516.1 | [M+H] <sup>+</sup>                  | 2637885.47 | 2978454.21 | ↑ |
| 291 | Scopoline                                         | 156.1023 | 108.2 | [M+H] <sup>+</sup>                  | 13398171.1 | 12761092.4 | ↓ |
| 292 | 5-Acetamidovalerate                               | 159.0839 | 539.8 | [M] <sup>+</sup>                    | 445143.083 | 755127.547 | ↑ |



|     |                                                                |          |       |                                     |            |            |   |
|-----|----------------------------------------------------------------|----------|-------|-------------------------------------|------------|------------|---|
| 293 | S-Methyl-L-methionine                                          | 164.074  | 330.6 | [M] <sup>+</sup>                    | 2472717.25 | 2471748.43 | ↓ |
| 294 | 7-Methylguanine                                                | 166.0727 | 323.6 | [M+H] <sup>+</sup>                  | 25125132.8 | 21655345.9 | ↓ |
| 295 | Tropate                                                        | 167.0567 | 332.2 | [M+H] <sup>+</sup>                  | 1951846.81 | 1911483.61 | ↓ |
| 296 | D-synephrine                                                   | 168.0914 | 340.5 | [M+H] <sup>+</sup>                  | 8229882.35 | 9941763.16 | ↑ |
| 297 | (S)-4-Hydroxymandelate                                         | 169.046  | 72    | [M+H] <sup>+</sup>                  | 53565906.5 | 44470968.2 | ↓ |
| 298 | (R)-2-O-Sulfolactate                                           | 169.977  | 618.7 | [M] <sup>+</sup>                    | 200314101  | 187614405  | ↓ |
| 299 | 3-Indoleacrylate                                               | 170.0604 | 399   | [M+H-H <sub>2</sub> O] <sup>+</sup> | 134446143  | 228115387  | ↑ |
| 300 | Diphenylamine                                                  | 170.0976 | 890.3 | [M+H] <sup>+</sup>                  | 21093790.1 | 15537918.6 | ↓ |
| 301 | N-Butyryl-L-homoserine lactone                                 | 172.0972 | 439.9 | [M+H] <sup>+</sup>                  | 4554103.76 | 3020463.03 | ↓ |
| 302 | 2-Oxoarginine                                                  | 173.0814 | 378.2 | [M] <sup>+</sup>                    | 30367534.7 | 17177014.7 | ↓ |
| 303 | Norselegiline                                                  | 174.1281 | 904.3 | [M+H] <sup>+</sup>                  | 4840441.22 | 6561137.98 | ↑ |
| 304 | N-Acetyl-L-glutamate 5-semialdehyde                            | 174.0878 | 106.6 | [M+H] <sup>+</sup>                  | 378819.367 | 16848490.1 | ↑ |
| 305 | N-Formyl-L-glutamic acid                                       | 176.0744 | 371.9 | [M+H] <sup>+</sup>                  | 1374660.75 | 1526822.15 | ↑ |
| 306 | Citrulline                                                     | 176.1038 | 111.3 | [M+H] <sup>+</sup>                  | 23544065.7 | 19363014.2 | ↓ |
| 307 | Methyleugenol                                                  | 179.107  | 799.6 | [M+H] <sup>+</sup>                  | 10791316   | 16450355.4 | ↑ |
| 308 | L-Homophenylalanine                                            | 180.1024 | 425.6 | [M+H] <sup>+</sup>                  | 2826149.67 | 3274314.01 | ↑ |
| 309 | (S)-beta-Tyrosine                                              | 182.0815 | 316.7 | [M+H] <sup>+</sup>                  | 11259848.6 | 7432227.26 | ↓ |
| 310 | Se-Methylselenocysteine                                        | 182.9847 | 60.6  | [M] <sup>+</sup>                    | 19922787.3 | 21791036.1 | ↑ |
| 311 | Hydroxyphenyllactic acid                                       | 183.0843 | 189.3 | [M+H] <sup>+</sup>                  | 50226135   | 49242894.2 | ↓ |
| 312 | Phosphorylcholine                                              | 184.0734 | 86.8  | [M+H] <sup>+</sup>                  | 1698741118 | 1463978006 | ↓ |
| 313 | 5-Guanidino-3-methyl-2-oxopentanoate                           | 187.1085 | 356.1 | [M] <sup>+</sup>                    | 2664956.15 | 5193175.04 | ↑ |
| 314 | Diaminopimelic acid                                            | 190.1078 | 444.4 | [M] <sup>+</sup>                    | 546054.323 | 904332.356 | ↑ |
| 315 | N,N-Diethyl-m-toluamide                                        | 192.1386 | 725.3 | [M+H] <sup>+</sup>                  | 1620486.55 | 2259847.97 | ↑ |
| 316 | Sequoiitol                                                     | 194.0816 | 304.1 | [M] <sup>+</sup>                    | 10795065.2 | 13228805.3 | ↑ |
| 317 | (-)-Salsoline                                                  | 194.118  | 973.4 | [M+H] <sup>+</sup>                  | 16561770   | 28334657.8 | ↑ |
| 318 | 3,4-Methylenedioxyamphetamine                                  | 194.1183 | 311.7 | [M+H] <sup>+</sup>                  | 33908745.7 | 38009034.1 | ↑ |
| 319 | 3-Methyl-L-tyrosine                                            | 195.0882 | 441.3 | [M] <sup>+</sup>                    | 2658803.04 | 4438785.59 | ↑ |
| 320 | gamma-Glutamyl-beta-aminopropionitrile                         | 200.0923 | 314.7 | [M+H] <sup>+</sup>                  | 2938031.91 | 3038441.55 | ↑ |
| 321 | Asymmetric dimethylarginine                                    | 203.1506 | 94.9  | [M+H] <sup>+</sup>                  | 89720962.6 | 82161628.6 | ↓ |
| 322 | N5-(L-1-Carboxyethyl)-L-ornithine                              | 204.1235 | 514.4 | [M] <sup>+</sup>                    | 9446216.03 | 5304754.14 | ↓ |
| 323 | 3,4-Dihydro-2-methylene-3-oxo-2H-1,4-benzoxazine-5-carboxylate | 206.0487 | 168.4 | [M+H] <sup>+</sup>                  | 6928975.12 | 7323952.65 | ↑ |
| 324 | Indolelactic acid                                              | 206.0817 | 550.1 | [M+H] <sup>+</sup>                  | 3601497.62 | 3887762.04 | ↑ |
| 325 | N-a-Acetylcitrulline                                           | 218.1135 | 89.5  | [M+H] <sup>+</sup>                  | 101220352  | 102518569  | ↑ |
| 326 | Capsidiol                                                      | 219.1746 | 676.3 | [M+H-H <sub>2</sub> O] <sup>+</sup> | 61878903.1 | 58485997.1 | ↓ |
| 327 | Pyrimidodiazepine                                              | 221.0925 | 399   | [M] <sup>+</sup>                    | 5990204.43 | 2670235.13 | ↓ |
| 328 | Prephenate                                                     | 226.0683 | 842.2 | [M] <sup>+</sup>                    | 25615284.6 | 24132356.5 | ↓ |
| 329 | beta-Alanyl-L-arginine                                         | 245.15   | 320.6 | [M] <sup>+</sup>                    | 5353479.46 | 5881618.08 | ↑ |
| 330 | Confertifolin                                                  | 234.1623 | 818.2 | [M] <sup>+</sup>                    | 1589644.93 | 2513966.42 | ↑ |
| 331 | 4a-Carbinolamine tetrahydrobiopterin                           | 239.1031 | 275.4 | [M] <sup>+</sup>                    | 484646.45  | 415536.83  | ↓ |
| 332 | Linatine                                                       | 260.1239 | 103.5 | [M+H] <sup>+</sup>                  | 12654132.2 | 15287524.6 | ↑ |
| 333 | 1-(3,4-Dihydroxyphenyl)-5-hydroxy-3-decanone                   | 281.1496 | 359.5 | [M+H] <sup>+</sup>                  | 7742718.87 | 6246501.38 | ↓ |
| 334 | Retinol                                                        | 269.2265 | 826.6 | [M+H-H <sub>2</sub> O] <sup>+</sup> | 5957287.69 | 5879556.06 | ↓ |
| 335 | Medicarpin                                                     | 270.0905 | 174.6 | [M] <sup>+</sup>                    | 10126289.6 | 12594724.2 | ↑ |
| 336 | (2R,3R)-3-Methylornithinyl-N6-lysine                           | 275.2084 | 67.9  | [M+H] <sup>+</sup>                  | 682246.743 | 6789654.92 | ↑ |

|     |                                                  |          |       |                                     |            |            |   |
|-----|--------------------------------------------------|----------|-------|-------------------------------------|------------|------------|---|
| 337 | 4-Hydroxycinnamoylagmatine                       | 276.1447 | 237.4 | [M] <sup>+</sup>                    | 8310000.63 | 25374140.3 | ↑ |
| 338 | Cyclopeptine                                     | 281.1138 | 332.3 | [M+H] <sup>+</sup>                  | 8144222.48 | 6590309.24 | ↓ |
| 339 | 3-Ketosphingosine                                | 280.2638 | 847.4 | [M+H-H <sub>2</sub> O] <sup>+</sup> | 18987735.6 | 20058188.9 | ↑ |
| 340 | Sphinganine                                      | 284.2943 | 781   | [M+H-H <sub>2</sub> O] <sup>+</sup> | 12004774.4 | 12458147.6 | ↑ |
| 341 | Cyclopentolate                                   | 292.1908 | 601.8 | [M+H] <sup>+</sup>                  | 917293.733 | 561774.378 | ↓ |
| 342 | 12-OPDA                                          | 292.2015 | 582.5 | [M] <sup>+</sup>                    | 4052639.8  | 4974328.66 | ↑ |
| 343 | 9(S)-HPOT                                        | 293.2115 | 835.1 | [M+H-H <sub>2</sub> O] <sup>+</sup> | 8531193.82 | 2858323.77 | ↓ |
| 344 | 13-OxoODE                                        | 295.2276 | 869.1 | [M+H] <sup>+</sup>                  | 5962101.18 | 9806082.65 | ↑ |
| 345 | 3-Dehydrosphinganine                             | 300.2901 | 816.8 | [M+H] <sup>+</sup>                  | 6594803.16 | 3475422.11 | ↓ |
| 346 | N-Acetylaspartylglutamic acid                    | 305.0985 | 196.1 | [M+H] <sup>+</sup>                  | 7949515.66 | 3352608.98 | ↓ |
| 347 | Methoprene                                       | 311.2584 | 807.4 | [M+H] <sup>+</sup>                  | 8921680.57 | 8185578.27 | ↓ |
| 348 | Progesterone                                     | 314.2325 | 674   | [M] <sup>+</sup>                    | 1562409.68 | 1125958.11 | ↓ |
| 349 | Decanoyl-L-carnitine                             | 316.2481 | 704.7 | [M+H] <sup>+</sup>                  | 76631836   | 43195915.4 | ↓ |
| 350 | 8,9-DiHETrE                                      | 321.2426 | 863   | [M+H-H <sub>2</sub> O] <sup>+</sup> | 6769857.71 | 6455579.88 | ↓ |
| 351 | gamma-L-Glutamyl-L-cysteinyl-beta-alanine        | 322.0772 | 194.2 | [M+H] <sup>+</sup>                  | 8691804.98 | 10331724.2 | ↑ |
| 352 | Prostaglandin E2                                 | 335.2218 | 668.2 | [M+H-H <sub>2</sub> O] <sup>+</sup> | 7254837.47 | 2036200.68 | ↓ |
| 353 | 2-Hydroxy-6-pentadecylbenzoic acid               | 349.2735 | 902.8 | [M+H] <sup>+</sup>                  | 12393684.6 | 6624485.6  | ↓ |
| 354 | Alpha-Linolenoyl ethanolamide                    | 350.3059 | 868.9 | [M+H] <sup>+</sup>                  | 73339086.9 | 126889840  | ↑ |
| 355 | (13E)-11a-Hydroxy-9,15-dioxoprost-13-enoic acid  | 353.2309 | 749.1 | [M+H] <sup>+</sup>                  | 13025954.8 | 5842124.2  | ↓ |
| 356 | 11b-PGF2a                                        | 354.2639 | 699.5 | [M] <sup>+</sup>                    | 1071537.82 | 559852.528 | ↓ |
| 357 | Nitrendipine                                     | 361.1392 | 554   | [M+H] <sup>+</sup>                  | 5599444.61 | 3805481.51 | ↓ |
| 358 | 1-Arachidonoylglycerol                           | 361.2736 | 826.8 | [M+H-H <sub>2</sub> O] <sup>+</sup> | 393258684  | 400743144  | ↑ |
| 359 | Sphinganine 1-phosphate                          | 364.2505 | 847.6 | [M+H-H <sub>2</sub> O] <sup>+</sup> | 13984188.4 | 9582428.83 | ↓ |
| 360 | Docosatetraenoyl Ethanolamide                    | 376.3104 | 802.7 | [M+H] <sup>+</sup>                  | 40743373.5 | 75759921.2 | ↑ |
| 361 | Dihydroanhydropodorhizol                         | 383.1503 | 228.7 | [M+H-H <sub>2</sub> O] <sup>+</sup> | 22538413.5 | 11232844.8 | ↓ |
| 362 | 3-Geranylgeranylindole                           | 390.3084 | 874.5 | [M+H] <sup>+</sup>                  | 12585886.5 | 7895994.09 | ↓ |
| 363 | Yamogenin                                        | 397.2945 | 918   | [M+H-H <sub>2</sub> O] <sup>+</sup> | 53510735.5 | 34588185.1 | ↓ |
| 364 | 14alpha-Hydroxy-5beta-cholest-7-ene-3,6-dione    | 414.3005 | 709.6 | [M] <sup>+</sup>                    | 2667211.56 | 3019906.47 | ↑ |
| 365 | 3-Keto-4-methylzymosterol                        | 397.3827 | 929.4 | [M+H] <sup>+</sup>                  | 7924647.87 | 10093140.6 | ↑ |
| 366 | Palmitoyl-L-carnitine                            | 400.3422 | 810.4 | [M+H] <sup>+</sup>                  | 664139618  | 1419134210 | ↑ |
| 367 | Delta-Tocopherol                                 | 403.3501 | 810.4 | [M+H] <sup>+</sup>                  | 1951639.86 | 3541368.42 | ↑ |
| 368 | Avenasterol                                      | 412.342  | 937.7 | [M] <sup>+</sup>                    | 3560786.21 | 5381157.52 | ↑ |
| 369 | Paspalicine                                      | 418.2432 | 827.5 | [M+H] <sup>+</sup>                  | 2951432.39 | 2272028.95 | ↓ |
| 370 | HC-toxin                                         | 437.2412 | 463.7 | [M+H] <sup>+</sup>                  | 705017.557 | 570347.575 | ↓ |
| 371 | 4a-Carboxy-4b-methyl-5a-cholesta-8,24-dien-3b-ol | 442.3535 | 918   | [M] <sup>+</sup>                    | 33038827   | 32426766.1 | ↓ |
| 372 | Retinoyl b-glucuronide                           | 476.2816 | 804.2 | [M] <sup>+</sup>                    | 10369031.6 | 9673145.66 | ↓ |
| 373 | 3-Dehydroecdysone                                | 462.2729 | 712.3 | [M] <sup>+</sup>                    | 3972441.99 | 653153.074 | ↓ |
| 374 | Antibiotic JI-20A                                | 482.3231 | 779.5 | [M+H] <sup>+</sup>                  | 37815309.7 | 62846257.2 | ↑ |
| 375 | 3-Epiecdysone                                    | 464.3072 | 721.6 | [M] <sup>+</sup>                    | 40231165   | 27247692.3 | ↓ |
| 376 | Cytochalasin B                                   | 480.2776 | 674.4 | [M+H] <sup>+</sup>                  | 7237588.07 | 8515540.78 | ↑ |
| 377 | Citicoline                                       | 489.1092 | 90.8  | [M+H] <sup>+</sup>                  | 213915319  | 157696336  | ↓ |
| 378 | Mibefradil                                       | 495.2981 | 903.9 | [M] <sup>+</sup>                    | 195404731  | 87684359.9 | ↓ |
| 379 | Cucurbitacin E                                   | 556.3011 | 876.3 | [M] <sup>+</sup>                    | 4335330.99 | 7857855.64 | ↑ |
| 380 | 5-Oxoavermectin "1b" aglycone                    | 568.3391 | 830.4 | [M] <sup>+</sup>                    | 218913760  | 76267871   | ↓ |

|     |                         |          |     |                  |           |           |   |
|-----|-------------------------|----------|-----|------------------|-----------|-----------|---|
| 381 | Avermectin B1b aglycone | 570.3581 | 872 | [M] <sup>+</sup> | 332323906 | 279905126 | ↓ |
|-----|-------------------------|----------|-----|------------------|-----------|-----------|---|

**Table S3** Identified for 191 metabolomics in negative ionization mode.

| No. | Name                                                                            | m/z      | Rt(s) | Addut                               | CON        | PM         | Variation |
|-----|---------------------------------------------------------------------------------|----------|-------|-------------------------------------|------------|------------|-----------|
| 1   | D-Proline                                                                       | 114.0549 | 127.5 | [M-H] <sup>-</sup>                  | 8065104.92 | 7061485.17 | ↓         |
| 2   | beta-D-3-Ribofuranosyluric acid                                                 | 299.0628 | 128.1 | [M-H] <sup>-</sup>                  | 5654349.99 | 2865122.45 | ↓         |
| 3   | UDP                                                                             | 384.9936 | 94    | [M-H <sub>2</sub> O-H] <sup>-</sup> | 1561897494 | 2016207909 | ↑         |
| 4   | 3-Dehydro-4-phospho-D-erythronate                                               | 212.9801 | 72.9  | [M-H] <sup>-</sup>                  | 7743442.07 | 3794135.94 | ↓         |
| 5   | Sedoheptulose 7-phosphate                                                       | 290.0364 | 76.3  | [M] <sup>-</sup>                    | 58920883   | 66744810.6 | ↑         |
| 6   | Sedoheptulose 1,7-bisphosphate                                                  | 368.9983 | 67.5  | [M-H] <sup>-</sup>                  | 17501221.1 | 24350258.8 | ↑         |
| 7   | 6-Acetyl-D-glucose                                                              | 221.0664 | 96.5  | [M-H] <sup>-</sup>                  | 125931784  | 78119374.3 | ↓         |
| 8   | beta-1,2-Mannobiose                                                             | 341.1008 | 422.1 | [M-H] <sup>-</sup>                  | 898119.337 | 420181.551 | ↓         |
| 9   | S-Glutathionyl-L-cysteine                                                       | 425.0789 | 81.1  | [M-H] <sup>-</sup>                  | 267690830  | 269927099  | ↑         |
| 10  | Oxidized glutathione                                                            | 611.1375 | 80    | [M-H] <sup>-</sup>                  | 767322747  | 691449477  | ↓         |
| 11  | 3'-Ketolactose                                                                  | 339.0944 | 345.9 | [M-H] <sup>-</sup>                  | 464171.217 | 1149116.89 | ↑         |
| 12  | Biotinyl-5'-AMP                                                                 | 573.1429 | 97.4  | [M] <sup>-</sup>                    | 1629075.59 | 1659438.48 | ↑         |
| 13  | 2-O-[2-O-(alpha-D-Mannopyranosyl)-alpha-D-glucopyranosyl]-3-phospho-D-glycerate | 509.0918 | 95.5  | [M-H] <sup>-</sup>                  | 31429530.1 | 19270690.3 | ↓         |
| 14  | Phosphoadenosine phosphosulfate                                                 | 505.9855 | 86.7  | [M-H] <sup>-</sup>                  | 33686621.2 | 30097705.6 | ↓         |
| 15  | N-Acetyl-D-Glucosamine 6-Phosphate                                              | 300.0497 | 78.3  | [M-H] <sup>-</sup>                  | 92897006.5 | 93057378.3 | ↑         |
| 16  | 9,12,13-TriHOME                                                                 | 329.2334 | 642.8 | [M-H] <sup>-</sup>                  | 28733139.2 | 8922370.53 | ↓         |
| 17  | 9,10-Dihydroxy-12,13-epoxyoctadecanoate                                         | 329.2339 | 624   | [M-H] <sup>-</sup>                  | 35688930.2 | 19374791.9 | ↓         |
| 18  | Dimethylglycine                                                                 | 102.0548 | 80.8  | [M-H] <sup>-</sup>                  | 18971836.6 | 14019118.5 | ↓         |
| 19  | L-Serine                                                                        | 104.0341 | 86.1  | [M-H] <sup>-</sup>                  | 60538618   | 40180694.1 | ↓         |
| 20  | Glyceric acid                                                                   | 105.0181 | 82.5  | [M-H] <sup>-</sup>                  | 142579812  | 137270754  | ↓         |
| 21  | L-Aspartic acid                                                                 | 132.0291 | 80.7  | [M-H] <sup>-</sup>                  | 158796987  | 274421574  | ↓         |
| 22  | Caproic acid                                                                    | 114.9332 | 922.6 | [M-H] <sup>-</sup>                  | 1427361004 | 1982528372 | ↑         |
| 23  | Fumaric acid                                                                    | 115.0025 | 74.4  | [M-H] <sup>-</sup>                  | 252592181  | 276268514  | ↑         |
| 24  | 5-Aminopentanoic acid                                                           | 116.9273 | 141   | [M] <sup>-</sup>                    | 47980363.4 | 75701688.7 | ↑         |
| 25  | trans-1,2-Cyclohexanediol                                                       | 115.9194 | 931.1 | [M] <sup>-</sup>                    | 56713781.8 | 320238240  | ↑         |
| 26  | Guanidinoacetate                                                                | 116.0494 | 366.1 | [M-H] <sup>-</sup>                  | 9983227.81 | 30975784.5 | ↑         |
| 27  | L-Valine                                                                        | 116.0702 | 112.8 | [M-H] <sup>-</sup>                  | 39457707.4 | 73944910.3 | ↑         |
| 28  | 3-Methylthiopropionic acid                                                      | 119.049  | 155.1 | [M-H] <sup>-</sup>                  | 3631528.63 | 3732274.69 | ↑         |
| 29  | Erythritol                                                                      | 121.0283 | 498.5 | [M-H] <sup>-</sup>                  | 23508713.3 | 22369414.4 | ↓         |
| 30  | Taurine                                                                         | 124.0063 | 86.6  | [M-H] <sup>-</sup>                  | 927163510  | 692215126  | ↓         |
| 31  | Pyroglutamic acid                                                               | 128.0339 | 90.5  | [M-H] <sup>-</sup>                  | 621074424  | 1162878357 | ↑         |
| 32  | Creatine                                                                        | 130.0611 | 96.7  | [M-H] <sup>-</sup>                  | 823602263  | 709836639  | ↓         |
| 33  | Leucine                                                                         | 130.0862 | 131.2 | [M-H] <sup>-</sup>                  | 174741183  | 165421503  | ↓         |
| 34  | L-Malic acid                                                                    | 133.0128 | 74.3  | [M-H] <sup>-</sup>                  | 2964417295 | 2100516378 | ↓         |
| 35  | Adenine                                                                         | 134.0457 | 921.7 | [M-H] <sup>-</sup>                  | 37150230.8 | 25881936.4 | ↓         |
| 36  | Phenyl acetate                                                                  | 134.8944 | 823.9 | [M-H] <sup>-</sup>                  | 70769877.7 | 47314744.3 | ↓         |
| 37  | Hypoxanthine                                                                    | 135.0292 | 130.5 | [M-H] <sup>-</sup>                  | 1186986534 | 851826093  | ↓         |
| 38  | O-Phosphoethanolamine                                                           | 140.0107 | 80.9  | [M-H] <sup>-</sup>                  | 82265834.3 | 63090752.2 | ↓         |

|    |                             |          |       |                         |            |            |   |
|----|-----------------------------|----------|-------|-------------------------|------------|------------|---|
| 39 | Aminoadipic acid            | 160.0606 | 81    | [M-H]-                  | 35262714.4 | 10538041.3 | ↓ |
| 40 | Spermidine                  | 143.9145 | 51.2  | [M-H]-                  | 10677711.3 | 9064416.05 | ↓ |
| 41 | Dimethylbenzimidazole       | 146.0813 | 156.4 | [M]-                    | 3918171.82 | 2540415.04 | ↓ |
| 42 | 2',4'-Dihydroxyacetophenone | 151.0391 | 609   | [M-H]-                  | 1741177.85 | 1238099.71 | ↓ |
| 43 | D-Xylitol                   | 151.0603 | 91.8  | [M-H]-                  | 21149909.5 | 13729081.8 | ↓ |
| 44 | Pelargonic acid             | 157.123  | 852.1 | [M-H]-                  | 270640691  | 373802825  | ↑ |
| 45 | Oxoadipic acid              | 158.9775 | 121.9 | [M-H]-                  | 98649665   | 69800578.3 | ↓ |
| 46 | Nicotine                    | 160.9347 | 862.5 | [M-H]-                  | 6834636.9  | 12662421.3 | ↑ |
| 47 | D-Galactose                 | 161.0447 | 96.1  | [M-H <sub>2</sub> O-H]- | 244901192  | 797643971  | ↑ |
| 48 | Phenylpyruvic acid          | 163.0402 | 394.2 | [M-H]-                  | 3808826.84 | 2479455.72 | ↓ |
| 49 | D-Phenylalanine             | 165.0184 | 985.7 | [M]-                    | 25268452.8 | 17649947.3 | ↓ |
| 50 | Phthalic acid               | 165.0407 | 884.8 | [M-H]-                  | 165704190  | 95237953.7 | ↓ |
| 51 | Uric acid                   | 167.0201 | 99.4  | [M-H]-                  | 527030078  | 529610552  | ↑ |
| 52 | N-Acetyl-leucine            | 172.0967 | 337.2 | [M-H]-                  | 2727687.78 | 1545630.09 | ↓ |
| 53 | Shikimic acid               | 172.9908 | 386.8 | [M-H]-                  | 6175320.23 | 2474031.75 | ↓ |
| 54 | N-Formyl-L-methionine       | 176.0378 | 132.2 | [M-H]-                  | 11985013.9 | 10574198.6 | ↓ |
| 55 | Gluconic acid               | 195.0503 | 82.4  | [M-H]-                  | 199489257  | 212757195  | ↑ |
| 56 | Paraxanthine                | 179.9882 | 950.2 | [M]-                    | 64596168.6 | 65905304.4 | ↑ |
| 57 | D-Mannose                   | 179.9884 | 751.9 | [M]-                    | 18646847.9 | 13873724.7 | ↓ |
| 58 | Azelaic acid                | 187.0958 | 986.4 | [M-H]-                  | 48418965.6 | 36663194.3 | ↓ |
| 59 | Homo-L-arginine             | 188.1116 | 126.4 | [M]-                    | 3111995.05 | 2334969.54 | ↓ |
| 60 | Citric acid                 | 191.0192 | 69.5  | [M-H]-                  | 420799062  | 213484985  | ↓ |
| 61 | L-Dopa                      | 196.061  | 154.2 | [M-H]-                  | 751046.422 | 707135.636 | ↓ |
| 62 | N-Acetylserotonin           | 199.1699 | 880.8 | [M-H <sub>2</sub> O-H]- | 77981204.4 | 33255760.2 | ↓ |
| 63 | L-Cystathionine             | 221.0598 | 83    | [M-H]-                  | 62796448.5 | 45464470.2 | ↓ |
| 64 | Methyl jasmonate            | 205.159  | 888.1 | [M-H <sub>2</sub> O-H]- | 14199472.6 | 15111521.8 | ↑ |
| 65 | Carnosine                   | 225.0973 | 98.1  | [M-H]-                  | 1.1132E+10 | 1.8481E+10 | ↑ |
| 66 | Methyldopa                  | 211.1337 | 631.3 | [M]-                    | 5169635.78 | 3400799.12 | ↓ |
| 67 | Pantothenic acid            | 218.1023 | 129.5 | [M-H]-                  | 1274619242 | 950943452  | ↓ |
| 68 | N-Acetylmannosamine         | 220.0824 | 100.9 | [M-H]-                  | 10619255.7 | 7925143.34 | ↓ |
| 69 | N-Acetyl-D-glucosamine      | 221.1544 | 675   | [M]-                    | 8323301.33 | 5769952.56 | ↓ |
| 70 | Thymidine                   | 223.028  | 855.8 | [M-H <sub>2</sub> O-H]- | 40576961.3 | 30153386.7 | ↓ |
| 71 | Myristic acid               | 227.2015 | 953.1 | [M-H]-                  | 181997949  | 168260912  | ↓ |
| 72 | gamma-Glutamylcysteine      | 248.9604 | 89.6  | [M-H]-                  | 6112916.86 | 7169348.44 | ↑ |
| 73 | Equol                       | 241.1811 | 762   | [M-H]-                  | 25341457.8 | 16532274.7 | ↓ |
| 74 | Uridine                     | 243.0619 | 130.5 | [M-H]-                  | 110678942  | 109813095  | ↓ |
| 75 | Pyridoxal phosphate         | 247.1702 | 868.6 | [M]-                    | 6829159.23 | 8787475.28 | ↑ |
| 76 | Deoxyguanosine              | 266.0898 | 298.3 | [M-H]-                  | 1381843.07 | 857884.93  | ↓ |
| 77 | 2'-Deoxyadenosine           | 251.0958 | 624.1 | [M]-                    | 11122142.4 | 7923799.79 | ↓ |
| 78 | 5,7-Dihydroxyflavone        | 253.0507 | 614.6 | [M-H]-                  | 999802.401 | 1118291.41 | ↑ |
| 79 | Stearic acid                | 284.2645 | 931.2 | [M]-                    | 868215874  | 876226354  | ↑ |
| 80 | Formononetin                | 267.1918 | 265.4 | [M-H]-                  | 5928860.39 | 5446139.72 | ↓ |
| 81 | Dehydroepiandrosterone      | 269.2125 | 845.6 | [M-H <sub>2</sub> O-H]- | 265690147  | 196180864  | ↓ |
| 82 | 17a-Estradiol               | 271.2279 | 826.3 | [M-H]-                  | 77329635   | 66113896.7 | ↓ |

|     |                                            |          |       |                         |            |            |   |
|-----|--------------------------------------------|----------|-------|-------------------------|------------|------------|---|
| 83  | Epiandrosterone                            | 271.2279 | 890.6 | [M-H <sub>2</sub> O-H]- | 669889498  | 143524916  | ↓ |
| 84  | 6-Phosphogluconic acid                     | 257.0069 | 75.7  | [M-H <sub>2</sub> O-H]- | 26379588.2 | 16339943.8 | ↓ |
| 85  | Kaempferide                                | 299.2547 | 755.2 | [M-H]-                  | 44149872.6 | 38412406.7 | ↓ |
| 86  | 2-Methoxyestradiol                         | 283.1696 | 888.9 | [M-H <sub>2</sub> O-H]- | 150081945  | 87213745.4 | ↓ |
| 87  | Ribose 1,5-bisphosphate                    | 309.1733 | 786.8 | [M-H]-                  | 71830022   | 59936894.7 | ↓ |
| 88  | Nonadecanoic acid                          | 297.2411 | 743.6 | [M-H]-                  | 14837973.6 | 14555143.9 | ↓ |
| 89  | all-trans-Retinoic acid                    | 300.205  | 906   | [M]-                    | 1153286.36 | 5859874.11 | ↑ |
| 90  | Arachidic acid                             | 311.2957 | 942.3 | [M-H]-                  | 13457217.8 | 7430420.31 | ↓ |
| 91  | dGMP                                       | 346.0552 | 119.2 | [M-H]-                  | 178562515  | 182743348  | ↑ |
| 92  | Fructose 1,6-bisphosphate                  | 338.989  | 67.6  | [M-H]-                  | 146653469  | 140693984  | ↓ |
| 93  | Cellobiose                                 | 341.1093 | 96.7  | [M-H]-                  | 385394834  | 283309497  | ↓ |
| 94  | Deoxycorticosterone acetate                | 371.0656 | 813.6 | [M-H]-                  | 2298047.79 | 2670252.66 | ↑ |
| 95  | Xanthylic acid                             | 363.0339 | 74.2  | [M-H]-                  | 34019856.6 | 14629470.8 | ↓ |
| 96  | S-Adenosylhomocysteine                     | 383.1138 | 308.3 | [M-H]-                  | 32853730.9 | 31931827.9 | ↓ |
| 97  | Chenodeoxycholic acid                      | 391.285  | 791   | [M-H]-                  | 9925957.1  | 8074022.64 | ↓ |
| 98  | ADP                                        | 426.0202 | 94.3  | [M-H]-                  | 113995968  | 176237956  | ↑ |
| 99  | Puerarin                                   | 415.1038 | 430.6 | [M-H]-                  | 5259137.25 | 3258789.46 | ↓ |
| 100 | Folic acid                                 | 441.2513 | 808.9 | [M]-                    | 21080827.5 | 11336494.1 | ↓ |
| 101 | Glycochenodeoxycholic acid                 | 448.3067 | 653.1 | [M-H]-                  | 979818.806 | 1773857.91 | ↑ |
| 102 | Glycocholic acid                           | 464.3018 | 602.9 | [M-H]-                  | 1966528.3  | 1355149.57 | ↓ |
| 103 | (R)-3-Hydroxybutyric acid                  | 103.0389 | 93.5  | [M-H]-                  | 90406135.4 | 84647925.7 | ↓ |
| 104 | Adipic acid                                | 127.0388 | 126.2 | [M-H <sub>2</sub> O-H]- | 27001339.1 | 41734345.2 | ↑ |
| 105 | 3-Methyl-2-oxovaleric acid                 | 129.0547 | 331.6 | [M-H]-                  | 26637168.8 | 18671900.7 | ↓ |
| 106 | cis-4-Hydroxy-D-proline                    | 130.0499 | 89.9  | [M-H]-                  | 92861285.8 | 64290331.5 | ↓ |
| 107 | Ribitol                                    | 133.0496 | 98    | [M-H <sub>2</sub> O-H]- | 20901964.6 | 14707730.2 | ↓ |
| 108 | 4-Nitrophenol                              | 138.0192 | 608.9 | [M-H]-                  | 6887004.27 | 10766793.4 | ↑ |
| 109 | Pimelic acid                               | 141.0547 | 81.8  | [M-H <sub>2</sub> O-H]- | 21703645.1 | 12218886.5 | ↓ |
| 110 | Aminosalicylic Acid                        | 152.0352 | 701   | [M-H]-                  | 2753615.89 | 1482005.04 | ↓ |
| 111 | Pyrophosphate                              | 176.9351 | 78.5  | [M-H]-                  | 3107638190 | 2533621006 | ↓ |
| 112 | m-Coumaric acid                            | 163.0391 | 154.8 | [M-H]-                  | 1928568.83 | 2164029.3  | ↑ |
| 113 | Formylanthranilic acid                     | 164.0348 | 349.3 | [M-H]-                  | 728280.543 | 780018.248 | ↑ |
| 114 | 4-Pyridoxic acid                           | 182.0445 | 338.4 | [M-H]-                  | 95739742.9 | 94399100.8 | ↓ |
| 115 | 1-Methylxanthine                           | 165.0397 | 967.1 | [M-H]-                  | 52389671.7 | 26930704.9 | ↓ |
| 116 | Phosphoenolpyruvic acid                    | 166.9743 | 70.3  | [M-H]-                  | 6758193.59 | 6892673.64 | ↑ |
| 117 | Dihydroxyacetone phosphate                 | 168.9899 | 75.3  | [M-H]-                  | 59704739.4 | 60219268.6 | ↑ |
| 118 | N-Acetylornithine                          | 173.0982 | 125.9 | [M-H]-                  | 20751860.1 | 16272839.1 | ↓ |
| 119 | D-Erythrose 4-phosphate                    | 199.0008 | 75.9  | [M-H]-                  | 280079114  | 214838997  | ↓ |
| 120 | L-Homocysteic acid                         | 182.0122 | 128.9 | [M-H]-                  | 78562901.4 | 9261985.85 | ↓ |
| 121 | (2R)-2-Hydroxy-3-(phosphonatoxy)propanoate | 184.9849 | 71.7  | [M-H]-                  | 133996141  | 100468802  | ↓ |
| 122 | Pantothenol                                | 204.1238 | 351.7 | [M-H]-                  | 1073549.6  | 773212.071 | ↓ |
| 123 | Xylulose 5-phosphate                       | 211.0008 | 78.3  | [M-H <sub>2</sub> O-H]- | 76039709.4 | 51029109.7 | ↓ |
| 124 | Dodecanedioic acid                         | 211.1324 | 805.8 | [M-H <sub>2</sub> O-H]- | 14263619.4 | 14641504.2 | ↑ |
| 125 | D-Arabinose 5-phosphate                    | 229.0114 | 77.1  | [M-H]-                  | 437327103  | 253334823  | ↓ |

|     |                                     |          |       |                         |            |            |   |
|-----|-------------------------------------|----------|-------|-------------------------|------------|------------|---|
| 126 | Gemfibrozil                         | 249.1496 | 736.6 | [M-H]-                  | 3064224.27 | 1166750.15 | ↓ |
| 127 | Glucose 6-phosphate                 | 260.0252 | 75.8  | [M]-                    | 204498129  | 285712691  | ↑ |
| 128 | Fructose 1-phosphate                | 241.0117 | 77.9  | [M-H <sub>2</sub> O-H]- | 72691235.4 | 29785253.7 | ↓ |
| 129 | Deoxyinosine                        | 251.0787 | 338.4 | [M-H]-                  | 1031040.47 | 975943.941 | ↓ |
| 130 | 16-Hydroxy hexadecanoic acid        | 271.2281 | 922.4 | [M-H]-                  | 57766384.3 | 44854066.3 | ↓ |
| 131 | [8]-Shogaol                         | 275.169  | 768.1 | [M-H]-                  | 37366640.1 | 7749922.47 | ↓ |
| 132 | Practolol                           | 265.1577 | 709.5 | [M-H]-                  | 3358648.78 | 254735.041 | ↓ |
| 133 | 9,10-Epoxyoctadecenoic acid         | 295.228  | 839.5 | [M-H]-                  | 3556278141 | 3091278585 | ↓ |
| 134 | 10E,12Z-Octadecadienoic acid        | 280.2365 | 780.6 | [M]-                    | 3286889308 | 1440989326 | ↓ |
| 135 | Gingerol                            | 293.1766 | 713.9 | [M-H]-                  | 5188620.25 | 1509314.55 | ↓ |
| 136 | 13-L-Hydroperoxylinoic acid         | 293.2124 | 855.1 | [M-H <sub>2</sub> O-H]- | 231494962  | 231334506  | ↓ |
| 137 | 13S-hydroxyoctadecadienoic acid     | 295.2307 | 714   | [M-H]-                  | 4833713.1  | 6445002.79 | ↑ |
| 138 | 16(R)-HETE                          | 319.2281 | 844.5 | [M-H]-                  | 417014483  | 405036735  | ↓ |
| 139 | 19(S)-HETE                          | 301.2169 | 855.8 | [M-H <sub>2</sub> O-H]- | 47949275.6 | 30446255.9 | ↓ |
| 140 | dTMP                                | 321.0482 | 123.1 | [M-H]-                  | 7350666.17 | 3092243.14 | ↓ |
| 141 | 6beta-Hydroxytestosterone           | 303.2    | 808.5 | [M-H]-                  | 29627194.5 | 8470476.25 | ↓ |
| 142 | Arachidonic acid                    | 303.2333 | 862.4 | [M-H]-                  | 120913624  | 75448081   | ↓ |
| 143 | Eicosadienoic acid                  | 308.2675 | 949.9 | [M]-                    | 161112754  | 156974644  | ↓ |
| 144 | 11Z-Eicosenoic acid                 | 310.2835 | 950.3 | [M]-                    | 122709057  | 81782748.7 | ↓ |
| 145 | Levonorgestrel                      | 311.2016 | 892.1 | [M-H]-                  | 321676305  | 211175342  | ↓ |
| 146 | 9(S)-HPODE                          | 311.2229 | 779.8 | [M-H]-                  | 818312544  | 359484648  | ↓ |
| 147 | 9,10-DHOME                          | 313.2382 | 766.8 | [M-H]-                  | 40220401.3 | 43345700   | ↑ |
| 148 | Prostaglandin A2                    | 333.2079 | 699.4 | [M-H]-                  | 2225004.8  | 1798182.75 | ↓ |
| 149 | 15-Deoxy-d-12,14-PGJ2               | 315.197  | 699.2 | [M-H]-                  | 1558632.59 | 1310964.98 | ↓ |
| 150 | 5-KETE                              | 317.2119 | 878   | [M-H]-                  | 34319019.4 | 22072284.5 | ↓ |
| 151 | Aesculin                            | 339.0643 | 958   | [M-H]-                  | 11937415   | 11513628.4 | ↓ |
| 152 | Docosapentaenoic acid (22n-3)       | 329.2483 | 973.9 | [M-H]-                  | 210735171  | 188666607  | ↓ |
| 153 | Adrenic acid                        | 331.2652 | 932.9 | [M-H]-                  | 100111361  | 75288743.9 | ↓ |
| 154 | Prostaglandin A1                    | 335.2233 | 793.6 | [M-H]-                  | 13750209.4 | 47273575.2 | ↑ |
| 155 | 14,15-DiHETrE                       | 337.2383 | 766.9 | [M-H]-                  | 4041481.31 | 3302318.73 | ↓ |
| 156 | Prostaglandin E3                    | 349.204  | 811.2 | [M-H]-                  | 5834399.92 | 3066708.38 | ↓ |
| 157 | GMP                                 | 362.0496 | 93.1  | [M-H]-                  | 98587333.8 | 64996515.8 | ↓ |
| 158 | Alpha-Tocotrienol                   | 423.3262 | 882.5 | [M-H]-                  | 899434357  | 456749096  | ↓ |
| 159 | FMN                                 | 455.0967 | 385.7 | [M-H]-                  | 9374329.12 | 5411113.14 | ↓ |
| 160 | Adenosine diphosphate ribose        | 540.0536 | 129   | [M-H <sub>2</sub> O-H]- | 30496381   | 24037712.7 | ↓ |
| 161 | Uridine diphosphate glucose         | 565.0437 | 80    | [M-H]-                  | 12952406.3 | 19450501.4 | ↑ |
| 162 | Uridine diphosphate glucuronic acid | 579.0351 | 70.1  | [M-H]-                  | 25375481   | 16030565.1 | ↓ |
| 163 | NADH                                | 664.1227 | 156.9 | [M-H]-                  | 18026005.7 | 14277136.2 | ↓ |
| 164 | FAD                                 | 784.1522 | 356.2 | [M-H]-                  | 78055597.8 | 70207189.8 | ↓ |
| 165 | Maltohexaose                        | 989.3319 | 124.6 | [M-H]-                  | 54742573   | 20418552.2 | ↓ |
| 166 | Biochanin A                         | 283.0681 | 703.4 | [M-H]-                  | 10597216.3 | 7416611.46 | ↓ |
| 167 | 1H-Indole-3-carboxaldehyde          | 144.0436 | 584.4 | [M-H]-                  | 31399012.8 | 21762957.3 | ↓ |
| 168 | Citramalic acid                     | 147.029  | 80.2  | [M-H]-                  | 33123906.3 | 24499207.4 | ↓ |
| 169 | 4-Hydroxycinnamic acid              | 163.0392 | 130.3 | [M-H]-                  | 11239831.8 | 8601980.74 | ↓ |

|     |                             |          |       |                         |            |            |   |
|-----|-----------------------------|----------|-------|-------------------------|------------|------------|---|
| 170 | 2(3H)-Benzothiazolethione   | 165.9784 | 671   | [M-H]-                  | 1662975.73 | 921614.599 | ↓ |
| 171 | Gallic acid                 | 169.0167 | 128.1 | [M-H]-                  | 3047625.58 | 2929042.72 | ↓ |
| 172 | Beta-Glycerophosphoric acid | 171.0056 | 77.9  | [M-H]-                  | 26470567.7 | 15787660.9 | ↓ |
| 173 | Capric acid                 | 171.1383 | 800.7 | [M-H]-                  | 15341791.8 | 7753310.57 | ↓ |
| 174 | 2,4-Dinitrophenol           | 183.0049 | 459.9 | [M-H]-                  | 2805943.07 | 2516373.64 | ↓ |
| 175 | Pentadecanoic acid          | 241.2175 | 812.7 | [M-H]-                  | 27665715.5 | 20723714.2 | ↓ |
| 176 | Palmitoleic acid            | 253.2153 | 727.8 | [M-H]-                  | 3613207.17 | 4748058.52 | ↑ |
| 177 | Dibutyl phthalate           | 277.1449 | 741.4 | [M-H]-                  | 4652289.16 | 1794823.73 | ↓ |
| 178 | Xanthosine                  | 283.0677 | 149.4 | [M-H]-                  | 3156092.68 | 2342907.25 | ↓ |
| 179 | 15-KETE                     | 317.212  | 856.1 | [M-H]-                  | 71530332.8 | 23379192.6 | ↓ |
| 180 | dIMP                        | 331.0436 | 119.4 | [M-H]-                  | 10314214.4 | 6032873.32 | ↓ |
| 181 | S-Lactoylglutathione        | 378.0949 | 128.6 | [M-H]-                  | 11985303.7 | 8470240.22 | ↓ |
| 182 | UDP-D-Xylose                | 535.0371 | 80    | [M-H]-                  | 11478226.4 | 5327870.57 | ↓ |
| 183 | Phenyllactate               | 165.0559 | 344.3 | [M-H]-                  | 16903288.3 | 12686095.2 | ↓ |
| 184 | Quinate                     | 173.0447 | 310.2 | [M-H <sub>2</sub> O-H]- | 3436178.56 | 5384905.32 | ↑ |
| 185 | Isopropylparaben            | 179.0708 | 740.8 | [M-H]-                  | 1073246.23 | 1242711.7  | ↑ |
| 186 | 4-Acetylaminohiphenyl       | 210.0955 | 484.4 | [M-H]-                  | 1007959.91 | 1058082.88 | ↑ |
| 187 | Shikimate 3-phosphate       | 253.0121 | 77.8  | [M-H]-                  | 3332159.59 | 2823439.37 | ↓ |
| 188 | Hexadecanedioate            | 285.2072 | 746.9 | [M-H]-                  | 18764940   | 8463722.15 | ↓ |
| 189 | 13(S)-HPOT                  | 291.2    | 770.8 | [M-H <sub>2</sub> O-H]- | 1273740.65 | 1456463.99 | ↑ |
| 190 | 12,13-DHOME                 | 314.2423 | 767.3 | [M]-                    | 1644170.83 | 6459802.73 | ↑ |
| 191 | EPA (d5)                    | 302.2197 | 923.4 | [M]-                    | 143689596  | 156691471  | ↑ |

**Table S4** The details of some flavour compounds of breast muscle in the CON and PM groups

| Name               | m/z      | Rt(s) | Addut              | CON        | PM         | Variation | Odor descriptors         |
|--------------------|----------|-------|--------------------|------------|------------|-----------|--------------------------|
| valeric acid       | 102.0911 | 533.4 | [M] <sup>+</sup>   | 3326764.92 | 2965388.44 | ↓         | Cheesy, acidic           |
| Isovaleric acid    | 102.0912 | 377.7 | [M] <sup>+</sup>   | 5235997.17 | 4379589.7  | ↓         | Pungent, cheesy, acidic  |
| Heptanoic acid     | 130.9673 | 254.6 | [M+H] <sup>+</sup> | 12088932.6 | 7431762.03 | ↓         | Waxy, cheesy, fruity     |
| Phenylacetaldehyde | 121.0648 | 340   | [M+H] <sup>+</sup> | 9949676.92 | 5971588.47 | ↓         | Floral, sweet, fermented |
| m-Cresol           | 109.0653 | 188.6 | [M+H] <sup>+</sup> | 8526141.64 | 8971680.77 | ↑         | Smoky, creamy, medicinal |
| Phenylacetic acid  | 136.0495 | 80.6  | [M] <sup>+</sup>   | 9337718.64 | 6480346.53 | ↓         | Sweet, floral            |
| 2,3-Butanediol     | 154.0444 | 319.5 | [M] <sup>+</sup>   | 8031221.35 | 4376043.89 | ↓         | Fruity, creamy, oily     |
| Benzaldehyde       | 107.0495 | 746.2 | [M+H] <sup>+</sup> | 89130279.9 | 70907821.4 | ↓         | Almond                   |

**Table S5** The details of the significantly enriched KEGG pathway are involved by different metabolites (In the red background).

| Tryptophan metabolism | Name                  | <i>P</i> -value | Variation |
|-----------------------|-----------------------|-----------------|-----------|
| C00078                | L-Tryptophan          | 0.02259         | ↓         |
| C00322                | 2-Oxoadipate          | 0.0440          | ↓         |
| C00978                | N-Acetylserotonin     | 0.1008          | ↓         |
| C00331                | Indolepyruvate        | 0.4443          | ↓         |
| C05653                | Formylanthranilate    | 0.6360          | ↑         |
| C00637                | Indole-3-acetaldehyde | 0.6252          | ↑         |

| Sphingolipid metabolism | Name                            | <i>P</i> -value | Variation |
|-------------------------|---------------------------------|-----------------|-----------|
| C00065                  | L-Serine                        | 0.0214          | ↓         |
| C00346                  | Ethanolamine                    | 0.1430          | ↓         |
| C02934                  | 3-Dehydrosphinganine            | 0.2193          | ↓         |
| C01120                  | Sphinganine 1-phosphate         | 0.3272          | ↓         |
| C00319                  | Sphingosine                     | 0.9850          | ↓         |
|                         | Sphinganine                     |                 |           |
| C00836                  | Dihydrosphingosine              | 0.8781          | ↑         |
|                         | 2-Amino-1,3-dihydroxyoctadecane |                 |           |

| Phenylalanine metabolism | Name               | <i>P</i> -value | Variation |
|--------------------------|--------------------|-----------------|-----------|
| C00079                   | L-Phenylalanine    | 0.0457          | ↓         |
| C07086                   | Phenylacetic acid  | 0.0189          | ↓         |
| C00601                   | Phenylacetaldehyde | 0.0890          | ↓         |
| C00166                   | Phenylpyruvate     | 0.2016          | ↓         |
| C00082                   | L-Tyrosine         | 0.7697          | ↓         |

| Phenylalanine, tyrosine and tryptophan biosynthesis | Name            | <i>P</i> -value | Variation |
|-----------------------------------------------------|-----------------|-----------------|-----------|
| C00166                                              | Phenylpyruvate  | 0.2016          | ↓         |
| C00079                                              | L-Phenylalanine | 0.0457          | ↓         |



|        |            |        |   |
|--------|------------|--------|---|
| C00082 | L-Tyrosine | 0.7697 | ↓ |
|--------|------------|--------|---|

**Figure S1** Visualization of creatine pathway and glycine, serine, and arginine metabolism are associated with a network.

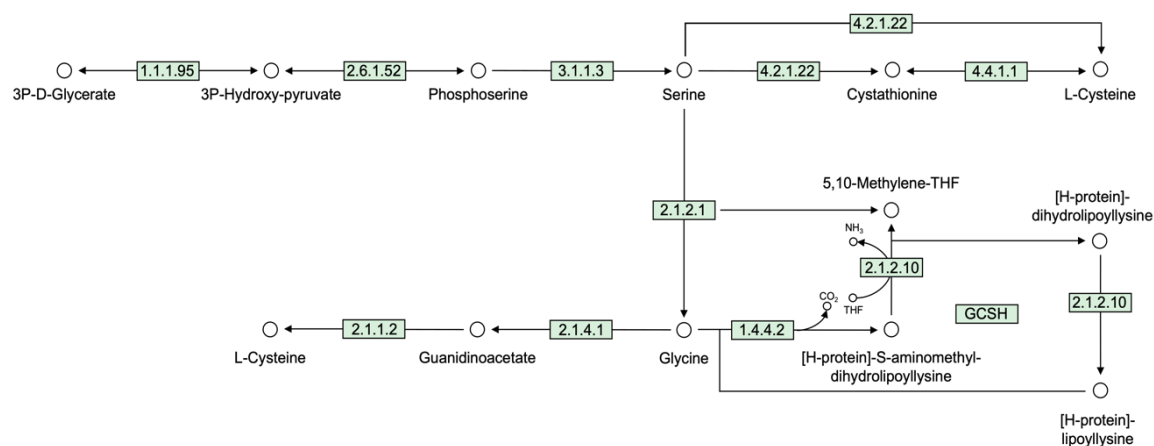

Supplement: s1 [file s1]
